# Supplementary material for: Diagnosis of Prostate Cancer through the Multi-Ligand Binding of Prostate-Derived Extracellular Vesicles and miRNA Analysis
Source: MDPI journal article supplement (doi:10.3390/life13040885), 2023-03-27
Supplement: s1 [file s1]

DIAGNOSIS OF PROSTATE CANCER VIA MULTI-LIGAND BINDING OF PROSTATE-  
DERIVED EXREACELLULAR VESICLES AND VESICULAR MI-RNA ANALYSIS

SUPPLEMENTARY DATA

Supplementary Table S1. Information about patients

|            | Age | Gleason score | Grade 1 | Grade 2 | Clinical stage | Risk group<br>(1 – high,<br>2 – medium,<br>3 – low) | PSA,<br>ng/ml | Prostate volume<br>(sm × sm × sm<br>× 0.52) |
|------------|-----|---------------|---------|---------|----------------|-----------------------------------------------------|---------------|---------------------------------------------|
| patient_1  | 68  | 7             | 3       | 4       | T3bN0M0        | 1                                                   | 25.0          | 80.0                                        |
| patient_2  | 73  | 6             | 3       | 3       | cT2cN0M0       | 1                                                   | 82.0          | 55.0                                        |
| patient_3  | 59  | 8             | 4       | 4       | cT2cN0M0       | 1                                                   | 9.7           | 50.0                                        |
| patient_4  | 62  | 6             | 3       | 3       | cT2aN0M0       | 3                                                   | 6.5           | 45.0                                        |
| patient_5  | 62  | 8             | 4       | 4       | T3aN0M0        | 1                                                   | 14.0          | 54.0                                        |
| patient_6  | 72  | 7             | 3       | 4       | T2cN0M0        | 2                                                   | 5.8           | 40.6                                        |
| patient_7  | 74  | 8             | 4       | 4       | T3aN0M0        | 1                                                   | 8.0           | 69.0                                        |
| patient_8  | 71  | 9             | 4       | 5       | T3bN1M0        | 1                                                   | 7.0           | 40.0                                        |
| patient_9  | 63  | 7             | 3       | 4       | T2bN0M0        | 2                                                   | 5.7           | 41.1                                        |
| patient_10 | 63  | 7             | 4       | 3       | T2aN0M0        | 2                                                   | 16.8          | 120.0                                       |
| patient_11 | 74  | 7             | 3       | 4       | T2cN0M0        | 2                                                   | 13.9          | 35.0                                        |
| patient_12 | 66  | 7             | 3       | 4       | T2bN0M0        | 2                                                   | 14.5          | 75.0                                        |
| patient_13 | 51  | 7             | 3       | 4       | T2cN0M0        | 1                                                   | 23.7          | 36.2                                        |
| patient_14 | 61  | 6             | 3       | 3       | T3aN0M0        | 1                                                   | 6.2           | 50.0                                        |
| patient_15 | 62  | 7             | 3       | 4       | T2cN0M0        | 2                                                   | 18.0          | 23.9                                        |
| patient_18 | 49  | 6             | 3       | 3       | T2cN0M0        | 2                                                   | 5.8           | 51.0                                        |
| patient_19 | 67  | 7             | 3       | 4       | T3bN0M0        | 1                                                   | 37.0          | 45.0                                        |
| patient_20 | 68  | 7             | 3       | 4       | T2cN0M0        | 2                                                   | 13.0          | 33.7                                        |
| patient_21 | 59  | 7             | 4       | 3       | T2aN0M0        | 2                                                   | 5.7           | 34.7                                        |
| patient_23 | 74  | 7             | 4       | 3       | T2cN0M0        | 1                                                   | 19.0          | 77.0                                        |
| patient_24 | 73  | 7             | 4       | 3       | T2aN0M0        | 2                                                   | 8.5           | 125.0                                       |
| patient_25 | 70  | 8             | 4       | 4       | T2bN0M0        | 1                                                   | 4.5           | 38.0                                        |
| patient_26 | 69  | 7             | 3       | 4       | cT2aN0M0       | 2                                                   | 7.5           | 42.5                                        |
| patient_27 | 72  | 8             | 4       | 4       | cT2cN0M0       | 1                                                   | 10.5          | 66.0                                        |
| patient_28 | 73  | 6             | 3       | 3       | cT2aN0M0       | 1                                                   | 9.8           | 34.0                                        |
| patient_29 | 61  | 6             | 3       | 3       | cT2bN0M0       | 2                                                   | 7.9           | 37.2                                        |
| patient_30 | 62  | 6             | 3       | 3       | cT2bN0M0       | 2                                                   | 12.0          | 35.0                                        |
| patient_31 | 64  | 7             | 4       | 3       | cT2cN0M0       | 2                                                   | 8.9           | 40.0                                        |
| patient_32 | 70  | 6             | 3       | 3       | cT2cN0M0       | 2                                                   | 7.5           | 33.0                                        |
| patient_33 | 74  | 6             | 3       | 3       | cT2cN0M0       | 2                                                   | 15.0          | 160.0                                       |
| patient_34 | 51  | 7             | 4       | 3       | cT2cN0M0       | 1                                                   | 27.2          | 18.0                                        |
| patient_36 | 64  | 6             | 3       | 3       | cT2aN0M0       | 3                                                   | 6.8           | 41.0                                        |

|            |    |   |   |   |          |   |      |      |
|------------|----|---|---|---|----------|---|------|------|
| patient_37 | 60 | 6 | 3 | 3 | cT2aN0M0 | 3 | 4.8  | 26.0 |
| patient_38 | 69 | 7 | 3 | 4 | T3bN1M0  | 1 | 20.0 | 36.5 |
| patient_39 | 65 | 7 | 3 | 4 | T2cN0M0  | 1 | 26.0 | 46.8 |
| patient_40 | 71 | 7 | 3 | 4 | T2cN0M0  | 2 | 8.6  | 8.0  |

Supplementary Table S2. DNA-aptamers sequences

| Aptamer | Sequence (5' → 3')                                                                        | Author's names | Targets                                 | Ref. |
|---------|-------------------------------------------------------------------------------------------|----------------|-----------------------------------------|------|
| Apt1    | acgctcggatgccactacaggttggggtcgggcatg<br>cgtccggagaagggcaaacgagagggtca<br>ccagcacgtccatgag | DML-7          | highly metastatic PC cells (PC3, DU145) | [1]  |
| Apt2    | tgcactacagctgggtcgggttggtgacttcgttcttc<br>gttggtgcttagtggc                                | Wy-5a          | PC3 cells and sections of PC            | [2]  |
| Apt3    | gaattcgcgttttcgcttttgcgttttgggtcatctgctta<br>cgatagcaatgct                                | Apt-PSMA       | PSMA-positive SEV from urine            | [3]  |
| Ap4     | catccatgggaattcgtcgaccctgcaggcatgcaa<br>gctttccctatagtgagtcgtattactgcctaggctcga<br>gctcg  | PSMA apt-P1    | SEVs secreted by LNCap cells            | [4]  |
| Apt5    | cctgcaggcatgcaagctttccctatagtgagtcgtat<br>ta                                              | B1             | PSMA on LNCap cell surface              | [5]  |
| Apt6    | gcgttttcgcttttgcgttttgggtcatctgcttacgata<br>gcaatgct                                      | PSMA-apt       | PSMA on LNCap cell surface              | [6]  |
| Apt7    | ccctacggcgctaaccatgctacgaattcgttgtaa<br>acaataggccaccgtgctacaa                            | AMC51          | Alpha-methylacyl CoA racemase (AMACR)   | [7]  |
| Apt8    | ccctacggcgctaaccagctactctagaaccatta<br>tattttgggccaccgtgctacaa                            | AMC56          | Alpha-methylacyl CoA racemase (AMACR)   | [7]  |
| CD63    | cacccacctcgtcccgtagactaatgcta                                                             | -              | -                                       | -    |
| CD30    | actgggcgaaacaagtctattgactatgag                                                            | C2NP           | K299 cells                              | [8]  |

Apt1 (DML-7) was selected by SELEX as preferably binding highly metastatic PC cells PC-3 and DU145, but not LNCaP or 22Rv1 with low metastatic potency [1]. The Apt2 (Wy-5a) was also selected by SELEX against PC-3 cells and its specificity was confirmed using sections of metastatic PC [2]. The Apt3 was validated to bind PSMA(+) vesicles from urine [3] whereas Apt4 was shown to bind specifically to SEVs secreted by LNCap prostate cancer cells but not SEVs secreted by other types of cancer cells [4]. Apt5 was generated by SELEX against PSMA on the surface of LNCap prostate cancer cells [5]. Apt6 was used within exosome-oriented, aptamer nanoprobe-based profiling (ExoAPP) assay to quantify PSMA on the surface of vesicles secreted by different cancer cells including LNCap [6]. Apt7 and Apt8 were selected by SELEX for binding of Alpha-methylacyl CoA racemase (AMACR), also known as P504S [9], that has been proven to be highly expressed in prostate cancer cells. All sequences were retrieved from original publications and synthesized.

Supplementary Table S3. List of miRNA assayed in pc-SEVs

| miRNA           | ALMIR cat # | Reference           |
|-----------------|-------------|---------------------|
| Hsa-mir-16-5p   | AL16-5p     | [10–12]             |
| Hsa-mir-20a-5p  | AL20a-5p    | [13–15]             |
| Hsa-mir-21-5p   | AL21–5p     | [11,13,16–18]       |
| Hsa-mir-26b-5p  | AL26b-5p    | [19]                |
| Hsa-mir-93-5p   | AL93-5p     | [14,20]             |
| Hsa-mir-106b-5p | AL106b-5p   | [21,22]             |
| Hsa-mir-125b-5p | AL125b-5p   | [10,16,23,24]       |
| Hsa-mir-141-3p  | AL141-3p    | [16,18,21,23]       |
| Hsa-mir-200b-3p | AL200b-3p   | [13,21,24]          |
| Hsa-mir-205-5p  | AL205–5p    | [10,24,25]          |
| Hsa-mir-375-3p  | AL375-3p    | [10,14,16,18,23,24] |
| Hsa-mir-451a-5p | AL451a-5p   | [11,26]             |

Supplementary Table S4. List of averaged Ct.

|            | Hsa-mir-16-5p | Hsa-mir-20a-5p | Hsa-mir-21-5p | Hsa-mir-26b-5p | Hsa-mir-93-5p | Hsa-mir-106b-5p | Hsa-mir-125b-5p | Hsa-mir-141-3p | Hsa-mir-200b-3p | Hsa-mir-205-5p | Hsa-mir-375-3p | Hsa-mir-451a-5p |
|------------|---------------|----------------|---------------|----------------|---------------|-----------------|-----------------|----------------|-----------------|----------------|----------------|-----------------|
| patient 1  | 29.96         | 29.03          | 25.04         | 30.75          | 28.50         | 27.25           | 22.46           | 29.21          | 34.66           | 25.10          | 28.89          | 27.67           |
| patient 2  | 30.29         | 28.27          | 25.69         | 29.37          | 28.75         | 28.13           | 22.11           | 28.93          | 39.56           | 25.12          | 29.44          | 26.17           |
| patient 3  | 34.75         | 33.91          | 24.80         | 30.03          | 28.05         | 21.89           | 21.27           | 31.46          | 24.60           | 31.81          | 26.58          | 22.10           |
| patient 4  | 27.46         | 29.12          | 24.97         | 30.13          | 27.29         | 27.56           | 23.21           | 29.87          | 35.45           | 27.51          | 29.83          | 24.02           |
| patient 5  | 34.90         | 30.93          | 30.34         | 32.29          | 31.13         | 37.98           | 31.18           | 31.94          | 32.20           | 26.28          | 33.83          | 30.43           |
| patient 6  | 29.94         | 30.56          | 29.24         | 32.15          | 29.96         | 33.12           | 30.87           | 31.61          | 32.34           | 26.22          | 31.58          | 26.18           |
| patient 7  | 33.65         | 30.35          | 29.08         | 31.54          | 30.61         | 37.16           | 29.93           | 31.31          | 31.40           | 26.51          | 31.00          | 26.01           |
| patient 8  | 28.30         | 29.85          | 28.01         | 31.84          | 29.13         | 36.11           | 31.38           | 32.24          | 33.22           | 26.26          | 32.64          | 24.94           |
| patient 9  | 28.49         | 31.71          | 26.96         | 30.31          | 28.28         | 33.05           | 29.29           | 29.83          | 30.28           | 25.28          | 33.35          | 25.36           |
| patient 10 | 27.86         | 28.93          | 25.49         | 30.15          | 26.88         | 33.84           | 27.69           | 29.75          | 30.19           | 28.56          | 33.20          | 24.57           |
| patient 11 | 28.91         | 31.05          | 26.17         | 30.05          | 27.86         | 34.65           | 27.91           | 29.97          | 30.07           | 25.37          | 37.59          | 25.00           |
| patient 12 | 28.17         | 30.84          | 25.27         | 30.36          | 27.01         | 34.04           | 30.35           | 30.38          | 30.46           | 25.68          | 33.58          | 24.15           |
| patient 13 | 29.16         | 29.26          | 26.91         | 32.73          | 29.07         | 31.72           | 29.57           | 30.51          | 30.13           | 30.93          | 31.33          | 26.19           |
| patient 14 | 30.22         | 30.70          | 27.59         | 35.17          | 30.06         | 31.03           | 29.11           | 30.12          | 30.28           | 30.39          | 34.52          | 27.46           |
| patient 15 | 29.26         | 28.96          | 27.21         | 33.28          | 28.81         | 32.21           | 22.65           | 30.34          | 29.74           | 30.97          | 34.00          | 26.98           |
| patient 18 | 29.21         | 29.15          | 26.81         | 33.57          | 28.44         | 32.84           | 25.80           | 29.91          | 30.10           | 31.20          | 32.69          | 25.44           |
| patient 19 | 29.05         | 29.43          | 26.81         | 30.13          | 28.59         | 34.14           | 26.73           | 30.38          | 29.63           | 25.29          | 29.93          | 27.15           |
| patient 20 | 31.01         | 30.02          | 29.18         | 30.66          | 30.60         | 32.79           | 29.72           | 30.94          | 31.01           | 25.83          | 33.70          | 27.23           |
| patient 21 | 30.03         | 29.36          | 27.26         | 32.62          | 28.00         | 32.66           | 26.94           | 29.14          | 29.86           | 30.51          | 31.47          | 26.92           |
| patient 23 | 28.39         | 33.38          | 28.43         | 31.49          | 29.08         | 32.41           | 29.45           | 31.25          | 30.63           | 25.69          | 34.50          | 27.06           |
| patient 24 | 28.28         | 29.91          | 27.37         | 31.53          | 27.00         | 30.51           | 27.84           | 28.07          | 29.31           | 29.92          | 30.11          | 28.19           |
| patient 25 | 30.67         | 29.58          | 27.72         | 30.77          | 28.49         | 31.14           | 29.90           | 30.83          | 30.18           | 25.78          | 34.53          | 24.48           |
| patient 26 | 24.77         | 28.08          | 24.00         | 30.42          | 25.41         | 29.14           | 27.50           | 26.75          | 30.31           | 28.76          | 29.80          | 21.43           |
| patient 27 | 30.16         | 35.08          | 27.58         | 32.12          | 27.81         | 31.61           | 27.16           | 28.77          | 29.52           | 30.31          | 30.50          | 26.51           |
| patient 28 | 31.02         | 29.76          | 27.27         | 30.70          | 28.49         | 34.38           | 27.94           | 30.13          | 30.65           | 25.39          | 28.83          | 27.40           |
| patient 29 | 28.65         | 30.10          | 26.36         | 31.51          | 29.40         | 32.01           | 29.80           | 30.60          | 33.53           | 25.83          | 28.76          | 25.85           |
| patient 30 | 27.81         | 29.90          | 28.20         | 32.07          | 29.14         | 32.23           | 29.81           | 30.30          | 33.02           | 25.75          | 30.12          | 25.96           |
| patient 31 | 26.52         | 29.60          | 26.44         | 32.11          | 28.44         | 31.10           | 29.97           | 29.85          | 32.67           | 26.32          | 31.01          | 23.29           |
| patient 32 | 28.24         | 30.75          | 27.27         | 33.25          | 29.01         | 31.90           | 26.70           | 30.41          | 30.13           | 30.58          | 33.79          | 25.19           |
| patient 33 | 29.05         | 30.79          | 27.63         | 33.30          | 29.36         | 32.00           | 26.35           | 30.04          | 30.39           | 30.83          | 34.32          | 25.38           |
| patient 34 | 31.25         | 30.87          | 29.40         | 32.53          | 30.75         | 34.69           | 30.87           | 30.78          | 33.25           | 26.42          | 35.46          | 31.11           |
| patient 36 | 30.16         | 31.04          | 29.43         | 30.95          | 30.36         | 33.18           | 30.63           | 30.58          | 32.42           | 26.30          | 27.16          | 28.01           |
| patient 37 | 29.52         | 30.37          | 26.64         | 33.21          | 28.26         | 35.91           | 25.87           | 28.05          | 29.50           | 29.78          | 30.06          | 27.38           |
| patient 38 | 26.79         | 29.28          | 25.39         | 30.91          | 28.00         | 31.12           | 30.46           | 30.60          | 31.94           | 26.40          | 31.77          | 24.13           |
| patient 39 | 27.27         | 29.74          | 26.53         | 31.22          | 28.73         | 31.92           | 29.96           | 30.68          | 31.96           | 26.61          | 26.63          | 28.07           |
| patient 40 | 28.45         | 30.80          | 27.72         | 31.00          | 30.04         | 32.54           | 30.39           | 29.86          | 31.97           | 26.25          | 31.95          | 27.61           |
| donor 1    | 30.26         | 32.16          | 28.27         | 34.71          | 30.67         | 35.90           | 38.62           | 40.64          | 32.62           | 30.78          | 30.21          | 26.28           |
| donor 2    | 30.16         | 31.87          | 27.45         | 33.81          | 29.01         | 34.71           | 37.29           | 35.90          | 31.96           | 30.94          | 31.17          | 26.55           |
| donor 3    | 29.77         | 31.19          | 27.70         | 32.67          | 29.54         | 34.11           | 35.07           | 39.12          | 31.60           | 30.19          | 29.21          | 25.35           |
| donor 4    | 30.18         | 31.70          | 27.58         | 32.99          | 29.50         | 32.70           | 38.20           | 40.81          | 31.86           | 31.03          | 30.03          | 26.25           |
| donor 5    | 26.76         | 29.08          | 26.23         | 31.40          | 27.88         | 31.47           | 27.88           | 29.35          | 31.38           | 30.29          | 27.33          | 23.46           |
| donor 6    | 26.66         | 28.40          | 25.32         | 29.57          | 28.09         | 26.83           | 26.73           | 29.70          | 28.90           | 30.14          | 27.96          | 24.73           |
| donor 7    | 27.51         | 28.56          | 26.03         | 30.84          | 28.23         | 30.86           | 26.78           | 29.36          | 30.23           | 30.08          | 28.99          | 24.26           |
| donor 8    | 34.26         | 29.86          | 26.63         | 31.82          | 28.32         | 36.77           | 27.83           | 29.48          | 31.13           | 30.28          | 28.92          | 26.03           |

|          | Hsa-mir-16-5p | Hsa-mir-20a-5p | Hsa-mir-21-5p | Hsa-mir-26b-5p | Hsa-mir-93-5p | Hsa-mir-106b-5p | Hsa-mir-125b-5p | Hsa-mir-141-3p | Hsa-mir-200b-3p | Hsa-mir-205-5p | Hsa-mir-375-3p | Hsa-mir-451a-5p |
|----------|---------------|----------------|---------------|----------------|---------------|-----------------|-----------------|----------------|-----------------|----------------|----------------|-----------------|
| donor_9  | 29.10         | 32.64          | 27.03         | 33.92          | 31.01         | 37.57           | 29.25           | 30.13          | 32.28           | 31.05          | 30.03          | 26.78           |
| donor_10 | 30.21         | 31.77          | 27.15         | 34.58          | 30.45         | 36.77           | 26.88           | 28.70          | 30.68           | 28.95          | 32.39          | 27.53           |
| donor_11 | 29.74         | 31.91          | 27.93         | 34.23          | 29.82         | 37.13           | 28.07           | 28.60          | 31.40           | 29.87          | 28.65          | 26.69           |
| donor_12 | 28.96         | 31.69          | 27.13         | 32.22          | 29.83         | 18.43           | 27.39           | 26.00          | 32.40           | 30.08          | 31.25          | 26.03           |
| donor_13 | 28.21         | 29.76          | 25.53         | 33.95          | 26.45         | 31.98           | 28.39           | 29.71          | 28.35           | 27.81          | 26.51          | 25.52           |
| donor_14 | 33.42         | 30.03          | 25.35         | 33.17          | 26.12         | 28.13           | 28.09           | 29.15          | 27.38           | 27.77          | 28.85          | 26.57           |
| donor_15 | 28.39         | 29.45          | 25.92         | 31.52          | 26.58         | 27.81           | 27.10           | 28.46          | 27.69           | 27.06          | 26.18          | 30.10           |
| donor_16 | 28.68         | 29.64          | 25.43         | 31.81          | 26.41         | 27.97           | 28.12           | 28.69          | 27.82           | 27.66          | 25.86          | 25.13           |
| donor_17 | 28.90         | 29.00          | 25.98         | 30.54          | 25.31         | 26.61           | 28.06           | 28.36          | 27.11           | 27.64          | 27.57          | 27.27           |
| donor_18 | 28.76         | 30.31          | 25.44         | 30.60          | 25.86         | 25.64           | 27.26           | 28.52          | 27.02           | 27.12          | 26.29          | 26.04           |

Supplementary Table S5. The amp-Ratio for each possible pair of miRNAs.

|            | mir16/mir20a | mir16/mir21 | mir16/mir26b | mir16/mir93 | mir16/mir106b | mir16/mir125b | mir16/mir141 | mir16/mir200b | mir16/mir205 | mir16/mir375 | mir16/mir451a |
|------------|--------------|-------------|--------------|-------------|---------------|---------------|--------------|---------------|--------------|--------------|---------------|
| patient 1  | 1.90         | 30.33       | 0.58         | 2.74        | 6.56          | 181.21        | 1.68         | 0.04          | 29.00        | 2.10         | 4.88          |
| patient 2  | 4.06         | 24.35       | 1.89         | 2.91        | 4.48          | 290.39        | 2.57         | 0.00          | 36.18        | 1.81         | 17.44         |
| patient 3  | 1.79         | 988.25      | 26.29        | 104.16      | 7435.39       | 11377.37      | 9.78         | 1134.84       | 7.68         | 288.08       | 6436.74       |
| patient 4  | 0.32         | 5.64        | 0.16         | 1.12        | 0.93          | 19.12         | 0.19         | 0.00          | 0.97         | 0.19         | 10.85         |
| patient 5  | 15.60        | 23.59       | 6.11         | 13.61       | 0.12          | 13.19         | 7.76         | 6.47          | 393.53       | 2.09         | 22.19         |
| patient 6  | 0.65         | 1.63        | 0.22         | 0.99        | 0.11          | 0.53          | 0.32         | 0.19          | 13.25        | 0.32         | 13.55         |
| patient 7  | 9.85         | 23.63       | 4.32         | 8.19        | 0.09          | 13.16         | 5.04         | 4.74          | 140.30       | 6.25         | 198.50        |
| patient 8  | 0.34         | 1.22        | 0.09         | 0.56        | 0.00          | 0.12          | 0.07         | 0.03          | 4.13         | 0.05         | 10.26         |
| patient 9  | 0.11         | 2.88        | 0.28         | 1.16        | 0.04          | 0.57          | 0.39         | 0.29          | 9.22         | 0.03         | 8.77          |
| patient 10 | 0.48         | 5.20        | 0.20         | 1.98        | 0.02          | 1.13          | 0.27         | 0.20          | 0.62         | 0.02         | 9.82          |
| patient 11 | 0.23         | 6.68        | 0.45         | 2.06        | 0.02          | 2.00          | 0.48         | 0.45          | 11.61        | 0.00         | 14.95         |
| patient 12 | 0.16         | 7.46        | 0.22         | 2.24        | 0.02          | 0.22          | 0.22         | 0.20          | 5.63         | 0.02         | 16.30         |
| patient 13 | 0.93         | 4.76        | 0.08         | 1.06        | 0.17          | 0.75          | 0.39         | 0.51          | 0.29         | 0.22         | 7.82          |
| patient 14 | 0.72         | 6.21        | 0.03         | 1.12        | 0.57          | 2.17          | 1.08         | 0.96          | 0.89         | 0.05         | 6.79          |
| patient 15 | 1.23         | 4.13        | 0.06         | 1.37        | 0.13          | 97.39         | 0.47         | 0.72          | 0.31         | 0.04         | 4.84          |
| patient 18 | 1.04         | 5.28        | 0.05         | 1.71        | 0.08          | 10.67         | 0.62         | 0.54          | 0.25         | 0.09         | 13.64         |
| patient 19 | 0.77         | 4.73        | 0.47         | 1.38        | 0.03          | 4.98          | 0.40         | 0.67          | 13.54        | 0.54         | 3.72          |
| patient 20 | 1.98         | 3.56        | 1.28         | 1.33        | 0.29          | 2.45          | 1.05         | 1.00          | 36.18        | 0.16         | 13.74         |
| patient 21 | 1.59         | 6.82        | 0.17         | 4.09        | 0.16          | 8.54          | 1.86         | 1.12          | 0.72         | 0.37         | 8.62          |
| patient 23 | 0.03         | 0.98        | 0.12         | 0.62        | 0.06          | 0.48          | 0.14         | 0.21          | 6.52         | 0.01         | 2.52          |
| patient 24 | 0.32         | 1.87        | 0.10         | 2.43        | 0.21          | 1.36          | 1.16         | 0.49          | 0.32         | 0.28         | 1.06          |
| patient 25 | 2.13         | 7.70        | 0.93         | 4.52        | 0.72          | 1.70          | 0.90         | 1.40          | 29.55        | 0.07         | 72.96         |
| patient 26 | 0.10         | 1.71        | 0.02         | 0.64        | 0.05          | 0.15          | 0.25         | 0.02          | 0.06         | 0.03         | 10.14         |
| patient 27 | 0.03         | 5.98        | 0.26         | 5.10        | 0.37          | 7.98          | 2.63         | 1.55          | 0.90         | 0.79         | 12.51         |
| patient 28 | 2.41         | 13.50       | 1.25         | 5.78        | 0.10          | 8.47          | 1.86         | 1.29          | 49.58        | 4.59         | 12.33         |
| patient 29 | 0.37         | 4.90        | 0.14         | 0.59        | 0.10          | 0.45          | 0.26         | 0.03          | 7.06         | 0.93         | 6.95          |
| patient 30 | 0.24         | 0.76        | 0.05         | 0.40        | 0.05          | 0.25          | 0.18         | 0.03          | 4.15         | 0.20         | 3.60          |
| patient 31 | 0.12         | 1.06        | 0.02         | 0.26        | 0.04          | 0.09          | 0.10         | 0.01          | 1.14         | 0.04         | 9.33          |
| patient 32 | 0.18         | 1.96        | 0.03         | 0.59        | 0.08          | 2.91          | 0.22         | 0.27          | 0.20         | 0.02         | 8.31          |
| patient 33 | 0.30         | 2.67        | 0.05         | 0.81        | 0.13          | 6.52          | 0.50         | 0.40          | 0.29         | 0.03         | 12.75         |
| patient 34 | 1.30         | 3.60        | 0.41         | 1.41        | 0.09          | 1.29          | 1.38         | 0.25          | 28.40        | 0.05         | 1.10          |
| patient 36 | 0.54         | 1.67        | 0.58         | 0.87        | 0.12          | 0.72          | 0.75         | 0.21          | 14.53        | 8.04         | 4.46          |
| patient 37 | 0.56         | 7.38        | 0.08         | 2.39        | 0.01          | 12.57         | 2.77         | 1.01          | 0.84         | 0.69         | 4.42          |
| patient 38 | 0.18         | 2.64        | 0.06         | 0.43        | 0.05          | 0.08          | 0.07         | 0.03          | 1.31         | 0.03         | 6.36          |
| patient 39 | 0.18         | 1.68        | 0.06         | 0.36        | 0.04          | 0.16          | 0.09         | 0.04          | 1.58         | 1.56         | 0.58          |
| patient 40 | 0.20         | 1.66        | 0.17         | 0.33        | 0.06          | 0.26          | 0.38         | 0.09          | 4.58         | 0.09         | 1.79          |

|            | mir20a/mir16 | mir20a/mir21 | mir20a/mir26b | mir20a/mir93 | mir20a/mir106b | mir20a/mir125b | mir20a/mir141 | mir20a/mir200b | mir20a/mir205 | mir20a/mir375 | mir20a/mir451a |
|------------|--------------|--------------|---------------|--------------|----------------|----------------|---------------|----------------|---------------|---------------|----------------|
| patient 1  | 0.53         | 15.98        | 0.30          | 1.45         | 3.45           | 95.49          | 0.88          | 0.02           | 15.28         | 1.11          | 2.57           |
| patient 2  | 0.25         | 6.00         | 0.47          | 0.72         | 1.10           | 71.60          | 0.63          | 0.00           | 8.92          | 0.45          | 4.30           |
| patient 3  | 0.56         | 553.49       | 14.73         | 58.34        | 4164.33        | 6372.11        | 5.48          | 635.59         | 4.30          | 161.34        | 3605.02        |
| patient 4  | 3.16         | 17.82        | 0.50          | 3.55         | 2.94           | 60.40          | 0.60          | 0.01           | 3.06          | 0.61          | 34.29          |
| patient 5  | 0.06         | 1.51         | 0.39          | 0.87         | 0.01           | 0.85           | 0.50          | 0.41           | 25.23         | 0.13          | 1.42           |
| patient 6  | 1.53         | 2.50         | 0.33          | 1.52         | 0.17           | 0.81           | 0.48          | 0.29           | 20.34         | 0.49          | 20.79          |
| patient 7  | 0.10         | 2.40         | 0.44          | 0.83         | 0.01           | 1.34           | 0.51          | 0.48           | 14.25         | 0.63          | 20.16          |
| patient 8  | 2.92         | 3.58         | 0.25          | 1.64         | 0.01           | 0.35           | 0.19          | 0.10           | 12.07         | 0.14          | 30.00          |
| patient 9  | 9.35         | 26.90        | 2.64          | 10.81        | 0.40           | 5.35           | 3.68          | 2.70           | 86.22         | 0.32          | 81.99          |
| patient 10 | 2.10         | 10.92        | 0.43          | 4.16         | 0.03           | 2.37           | 0.57          | 0.42           | 1.30          | 0.05          | 20.64          |
| patient 11 | 4.42         | 29.53        | 2.00          | 9.12         | 0.08           | 8.84           | 2.12          | 1.97           | 51.31         | 0.01          | 66.09          |
| patient 12 | 6.34         | 47.27        | 1.39          | 14.22        | 0.11           | 1.40           | 1.37          | 1.30           | 35.69         | 0.15          | 103.29         |
| patient 13 | 1.07         | 5.10         | 0.09          | 1.14         | 0.18           | 0.80           | 0.42          | 0.55           | 0.31          | 0.24          | 8.38           |
| patient 14 | 1.39         | 8.61         | 0.05          | 1.55         | 0.79           | 3.01           | 1.49          | 1.34           | 1.23          | 0.07          | 9.41           |
| patient 15 | 0.81         | 3.37         | 0.05          | 1.12         | 0.11           | 79.30          | 0.38          | 0.58           | 0.25          | 0.03          | 3.94           |
| patient 18 | 0.96         | 5.05         | 0.05          | 1.64         | 0.08           | 10.22          | 0.59          | 0.52           | 0.24          | 0.09          | 13.07          |
| patient 19 | 1.31         | 6.17         | 0.62          | 1.80         | 0.04           | 6.50           | 0.52          | 0.87           | 17.67         | 0.71          | 4.86           |
| patient 20 | 0.50         | 1.79         | 0.64          | 0.67         | 0.15           | 1.24           | 0.53          | 0.50           | 18.24         | 0.08          | 6.93           |
| patient 21 | 0.63         | 4.29         | 0.10          | 2.58         | 0.10           | 5.38           | 1.17          | 0.71           | 0.45          | 0.23          | 5.43           |
| patient 23 | 31.72        | 30.97        | 3.70          | 19.71        | 1.96           | 15.24          | 4.38          | 6.73           | 206.85        | 0.46          | 80.00          |
| patient 24 | 3.10         | 5.82         | 0.33          | 7.53         | 0.66           | 4.21           | 3.59          | 1.51           | 1.00          | 0.87          | 3.31           |
| patient 25 | 0.47         | 3.62         | 0.44          | 2.12         | 0.34           | 0.80           | 0.42          | 0.66           | 13.88         | 0.03          | 34.28          |
| patient 26 | 9.90         | 16.90        | 0.20          | 6.35         | 0.48           | 1.50           | 2.51          | 0.21           | 0.62          | 0.30          | 100.39         |
| patient 27 | 30.24        | 180.80       | 7.79          | 154.14       | 11.07          | 241.36         | 79.49         | 47.00          | 27.32         | 23.94         | 378.36         |
| patient 28 | 0.42         | 5.61         | 0.52          | 2.40         | 0.04           | 3.52           | 0.77          | 0.54           | 20.61         | 1.91          | 5.13           |
| patient 29 | 2.72         | 13.34        | 0.37          | 1.62         | 0.27           | 1.23           | 0.70          | 0.09           | 19.24         | 2.52          | 18.92          |
| patient 30 | 4.25         | 3.23         | 0.22          | 1.69         | 0.20           | 1.06           | 0.75          | 0.11           | 17.65         | 0.85          | 15.30          |
| patient 31 | 8.46         | 8.94         | 0.18          | 2.23         | 0.35           | 0.77           | 0.84          | 0.12           | 9.67          | 0.38          | 78.99          |
| patient 32 | 5.71         | 11.21        | 0.18          | 3.35         | 0.45           | 16.59          | 1.27          | 1.54           | 1.13          | 0.12          | 47.42          |
| patient 33 | 3.33         | 8.90         | 0.18          | 2.68         | 0.43           | 21.72          | 1.68          | 1.32           | 0.97          | 0.09          | 42.46          |
| patient 34 | 0.77         | 2.77         | 0.32          | 1.09         | 0.07           | 1.00           | 1.06          | 0.19           | 21.89         | 0.04          | 0.85           |
| patient 36 | 1.84         | 3.07         | 1.07          | 1.61         | 0.23           | 1.33           | 1.38          | 0.38           | 26.73         | 14.80         | 8.21           |
| patient 37 | 1.80         | 13.27        | 0.14          | 4.30         | 0.02           | 22.61          | 4.99          | 1.83           | 1.50          | 1.24          | 7.95           |
| patient 38 | 5.60         | 14.80        | 0.32          | 2.42         | 0.28           | 0.44           | 0.40          | 0.16           | 7.34          | 0.18          | 35.61          |
| patient 39 | 5.54         | 9.30         | 0.36          | 2.02         | 0.22           | 0.86           | 0.52          | 0.22           | 8.78          | 8.62          | 3.20           |
| patient 40 | 5.12         | 8.49         | 0.87          | 1.69         | 0.30           | 1.33           | 1.93          | 0.45           | 23.46         | 0.45          | 9.17           |



|            | mir21/mir16 | mir21/mir20a | mir21/mir26b | mir21/mir93 | mir21/mir106b | mir21/mir125b | mir21/mir141 | mir21/mir200b | mir21/mir205 | mir21/mir375 | mir21/mir451a |
|------------|-------------|--------------|--------------|-------------|---------------|---------------|--------------|---------------|--------------|--------------|---------------|
| patient 1  | 0.03        | 0.06         | 0.02         | 0.09        | 0.22          | 5.98          | 0.06         | 0.00          | 0.96         | 0.07         | 0.16          |
| patient 2  | 0.04        | 0.17         | 0.08         | 0.12        | 0.18          | 11.93         | 0.11         | 0.00          | 1.49         | 0.07         | 0.72          |
| patient 3  | 0.00        | 0.00         | 0.03         | 0.11        | 7.52          | 11.51         | 0.01         | 1.15          | 0.01         | 0.29         | 6.51          |
| patient 4  | 0.18        | 0.06         | 0.03         | 0.20        | 0.17          | 3.39          | 0.03         | 0.00          | 0.17         | 0.03         | 1.92          |
| patient 5  | 0.04        | 0.66         | 0.26         | 0.58        | 0.01          | 0.56          | 0.33         | 0.27          | 16.68        | 0.09         | 0.94          |
| patient 6  | 0.61        | 0.40         | 0.13         | 0.61        | 0.07          | 0.32          | 0.19         | 0.12          | 8.15         | 0.20         | 8.33          |
| patient 7  | 0.04        | 0.42         | 0.18         | 0.35        | 0.00          | 0.56          | 0.21         | 0.20          | 5.94         | 0.26         | 8.40          |
| patient 8  | 0.82        | 0.28         | 0.07         | 0.46        | 0.00          | 0.10          | 0.05         | 0.03          | 3.37         | 0.04         | 8.38          |
| patient 9  | 0.35        | 0.04         | 0.10         | 0.40        | 0.01          | 0.20          | 0.14         | 0.10          | 3.20         | 0.01         | 3.05          |
| patient 10 | 0.19        | 0.09         | 0.04         | 0.38        | 0.00          | 0.22          | 0.05         | 0.04          | 0.12         | 0.00         | 1.89          |
| patient 11 | 0.15        | 0.03         | 0.07         | 0.31        | 0.00          | 0.30          | 0.07         | 0.07          | 1.74         | 0.00         | 2.24          |
| patient 12 | 0.13        | 0.02         | 0.03         | 0.30        | 0.00          | 0.03          | 0.03         | 0.03          | 0.76         | 0.00         | 2.19          |
| patient 13 | 0.21        | 0.20         | 0.02         | 0.22        | 0.04          | 0.16          | 0.08         | 0.11          | 0.06         | 0.05         | 1.64          |
| patient 14 | 0.16        | 0.12         | 0.01         | 0.18        | 0.09          | 0.35          | 0.17         | 0.16          | 0.14         | 0.01         | 1.09          |
| patient 15 | 0.24        | 0.30         | 0.01         | 0.33        | 0.03          | 23.56         | 0.11         | 0.17          | 0.07         | 0.01         | 1.17          |
| patient 18 | 0.19        | 0.20         | 0.01         | 0.32        | 0.02          | 2.02          | 0.12         | 0.10          | 0.05         | 0.02         | 2.59          |
| patient 19 | 0.21        | 0.16         | 0.10         | 0.29        | 0.01          | 1.05          | 0.08         | 0.14          | 2.86         | 0.11         | 0.79          |
| patient 20 | 0.28        | 0.56         | 0.36         | 0.37        | 0.08          | 0.69          | 0.29         | 0.28          | 10.18        | 0.04         | 3.87          |
| patient 21 | 0.15        | 0.23         | 0.02         | 0.60        | 0.02          | 1.25          | 0.27         | 0.16          | 0.11         | 0.05         | 1.26          |
| patient 23 | 1.02        | 0.03         | 0.12         | 0.64        | 0.06          | 0.49          | 0.14         | 0.22          | 6.68         | 0.01         | 2.58          |
| patient 24 | 0.53        | 0.17         | 0.06         | 1.29        | 0.11          | 0.72          | 0.62         | 0.26          | 0.17         | 0.15         | 0.57          |
| patient 25 | 0.13        | 0.28         | 0.12         | 0.59        | 0.09          | 0.22          | 0.12         | 0.18          | 3.84         | 0.01         | 9.47          |
| patient 26 | 0.59        | 0.06         | 0.01         | 0.38        | 0.03          | 0.09          | 0.15         | 0.01          | 0.04         | 0.02         | 5.94          |
| patient 27 | 0.17        | 0.01         | 0.04         | 0.85        | 0.06          | 1.33          | 0.44         | 0.26          | 0.15         | 0.13         | 2.09          |
| patient 28 | 0.07        | 0.18         | 0.09         | 0.43        | 0.01          | 0.63          | 0.14         | 0.10          | 3.67         | 0.34         | 0.91          |
| patient 29 | 0.20        | 0.07         | 0.03         | 0.12        | 0.02          | 0.09          | 0.05         | 0.01          | 1.44         | 0.19         | 1.42          |
| patient 30 | 1.31        | 0.31         | 0.07         | 0.52        | 0.06          | 0.33          | 0.23         | 0.04          | 5.46         | 0.26         | 4.73          |
| patient 31 | 0.95        | 0.11         | 0.02         | 0.25        | 0.04          | 0.09          | 0.09         | 0.01          | 1.08         | 0.04         | 8.83          |
| patient 32 | 0.51        | 0.09         | 0.02         | 0.30        | 0.04          | 1.48          | 0.11         | 0.14          | 0.10         | 0.01         | 4.23          |
| patient 33 | 0.37        | 0.11         | 0.02         | 0.30        | 0.05          | 2.44          | 0.19         | 0.15          | 0.11         | 0.01         | 4.77          |
| patient 34 | 0.28        | 0.36         | 0.11         | 0.39        | 0.03          | 0.36          | 0.38         | 0.07          | 7.89         | 0.01         | 0.31          |
| patient 36 | 0.60        | 0.33         | 0.35         | 0.52        | 0.07          | 0.43          | 0.45         | 0.13          | 8.72         | 4.83         | 2.68          |
| patient 37 | 0.14        | 0.08         | 0.01         | 0.32        | 0.00          | 1.70          | 0.38         | 0.14          | 0.11         | 0.09         | 0.60          |
| patient 38 | 0.38        | 0.07         | 0.02         | 0.16        | 0.02          | 0.03          | 0.03         | 0.01          | 0.50         | 0.01         | 2.41          |
| patient 39 | 0.60        | 0.11         | 0.04         | 0.22        | 0.02          | 0.09          | 0.06         | 0.02          | 0.94         | 0.93         | 0.34          |
| patient 40 | 0.60        | 0.12         | 0.10         | 0.20        | 0.04          | 0.16          | 0.23         | 0.05          | 2.76         | 0.05         | 1.08          |

|            | mir26b/mir16 | mir26b/mir20a | mir26b/mir21 | mir26b/mir93 | mir26b/mir106b | mir26b/mir125b | mir26b/mir141 | mir26b/mir200b | mir26b/mir205 | mir26b/mir375 | mir26b/mir451a |
|------------|--------------|---------------|--------------|--------------|----------------|----------------|---------------|----------------|---------------|---------------|----------------|
| patient 1  | 1.73         | 3.28          | 52.43        | 4.74         | 11.33          | 313.26         | 2.90          | 0.07           | 50.13         | 3.63          | 8.44           |
| patient 2  | 0.53         | 2.14          | 12.86        | 1.54         | 2.36           | 153.36         | 1.35          | 0.00           | 19.11         | 0.96          | 9.21           |
| patient 3  | 0.04         | 0.07          | 37.58        | 3.96         | 282.77         | 432.68         | 0.37          | 43.16          | 0.29          | 10.96         | 244.79         |
| patient 4  | 6.34         | 2.01          | 35.79        | 7.13         | 5.91           | 121.26         | 1.20          | 0.02           | 6.15          | 1.23          | 68.85          |
| patient 5  | 0.16         | 2.55          | 3.86         | 2.23         | 0.02           | 2.16           | 1.27          | 1.06           | 64.40         | 0.34          | 3.63           |
| patient 6  | 4.62         | 3.01          | 7.51         | 4.57         | 0.51           | 2.43           | 1.46          | 0.88           | 61.19         | 1.49          | 62.56          |
| patient 7  | 0.23         | 2.28          | 5.48         | 1.90         | 0.02           | 3.05           | 1.17          | 1.10           | 32.51         | 1.45          | 46.00          |
| patient 8  | 11.58        | 3.96          | 14.18        | 6.51         | 0.05           | 1.37           | 0.76          | 0.38           | 47.81         | 0.57          | 118.81         |
| patient 9  | 3.54         | 0.38          | 10.20        | 4.10         | 0.15           | 2.03           | 1.39          | 1.02           | 32.68         | 0.12          | 31.08          |
| patient 10 | 4.88         | 2.32          | 25.37        | 9.67         | 0.08           | 5.51           | 1.32          | 0.97           | 3.01          | 0.12          | 47.93          |
| patient 11 | 2.21         | 0.50          | 14.79        | 4.57         | 0.04           | 4.43           | 1.06          | 0.99           | 25.70         | 0.01          | 33.11          |
| patient 12 | 4.56         | 0.72          | 34.03        | 10.24        | 0.08           | 1.01           | 0.99          | 0.93           | 25.70         | 0.11          | 74.36          |
| patient 13 | 11.93        | 11.12         | 56.73        | 12.70        | 2.01           | 8.95           | 4.65          | 6.07           | 3.47          | 2.65          | 93.22          |
| patient 14 | 30.79        | 22.21         | 191.17       | 34.43        | 17.62          | 66.78          | 33.15         | 29.70          | 27.42         | 1.56          | 209.07         |
| patient 15 | 16.23        | 19.93         | 67.08        | 22.24        | 2.10           | 1580.38        | 7.66          | 11.66          | 4.95          | 0.61          | 78.62          |
| patient 18 | 20.46        | 21.36         | 107.95       | 34.97        | 1.65           | 218.29         | 12.60         | 11.09          | 5.17          | 1.84          | 279.20         |
| patient 19 | 2.11         | 1.62          | 9.98         | 2.90         | 0.06           | 10.50          | 0.84          | 1.41           | 28.56         | 1.15          | 7.85           |
| patient 20 | 0.78         | 1.55          | 2.78         | 1.04         | 0.23           | 1.92           | 0.82          | 0.78           | 28.30         | 0.12          | 10.75          |
| patient 21 | 6.03         | 9.57          | 41.08        | 24.65        | 0.98           | 51.45          | 11.19         | 6.78           | 4.33          | 2.22          | 51.93          |
| patient 23 | 8.57         | 0.27          | 8.37         | 5.32         | 0.53           | 4.12           | 1.18          | 1.82           | 55.87         | 0.12          | 21.61          |
| patient 24 | 9.55         | 3.08          | 17.91        | 23.18        | 2.03           | 12.95          | 11.04         | 4.65           | 3.06          | 2.69          | 10.17          |
| patient 25 | 1.08         | 2.29          | 8.30         | 4.87         | 0.78           | 1.83           | 0.96          | 1.51           | 31.83         | 0.07          | 78.59          |
| patient 26 | 50.03        | 5.05          | 85.39        | 32.07        | 2.43           | 7.56           | 12.68         | 1.08           | 3.15          | 1.53          | 507.28         |
| patient 27 | 3.88         | 0.13          | 23.22        | 19.80        | 1.42           | 31.00          | 10.21         | 6.04           | 3.51          | 3.08          | 48.60          |
| patient 28 | 0.80         | 1.93          | 10.80        | 4.63         | 0.08           | 6.78           | 1.49          | 1.03           | 39.68         | 3.68          | 9.87           |
| patient 29 | 7.28         | 2.67          | 35.62        | 4.32         | 0.71           | 3.28           | 1.88          | 0.25           | 51.38         | 6.74          | 50.55          |
| patient 30 | 19.16        | 4.51          | 14.59        | 7.62         | 0.89           | 4.78           | 3.40          | 0.52           | 79.58         | 3.86          | 68.98          |
| patient 31 | 48.30        | 5.71          | 51.03        | 12.72        | 2.01           | 4.40           | 4.79          | 0.68           | 55.16         | 2.14          | 450.78         |
| patient 32 | 32.11        | 5.63          | 63.06        | 18.83        | 2.53           | 93.39          | 7.14          | 8.68           | 6.36          | 0.68          | 266.88         |
| patient 33 | 19.01        | 5.71          | 50.83        | 15.31        | 2.47           | 124.00         | 9.56          | 7.55           | 5.53          | 0.49          | 242.36         |
| patient 34 | 2.43         | 3.16          | 8.76         | 3.43         | 0.22           | 3.15           | 3.36          | 0.61           | 69.08         | 0.13          | 2.68           |
| patient 36 | 1.73         | 0.94          | 2.88         | 1.51         | 0.21           | 1.25           | 1.29          | 0.36           | 25.09         | 13.89         | 7.71           |
| patient 37 | 12.91        | 7.18          | 95.26        | 30.86        | 0.15           | 162.33         | 35.80         | 13.10          | 10.79         | 8.87          | 57.09          |
| patient 38 | 17.34        | 3.10          | 45.84        | 7.50         | 0.86           | 1.37           | 1.24          | 0.49           | 22.74         | 0.55          | 110.27         |
| patient 39 | 15.48        | 2.79          | 25.98        | 5.64         | 0.62           | 2.40           | 1.45          | 0.60           | 24.53         | 24.09         | 8.94           |
| patient 40 | 5.87         | 1.15          | 9.73         | 1.94         | 0.34           | 1.53           | 2.21          | 0.51           | 26.88         | 0.52          | 10.51          |

|            | mir93/mir16 | mir93/mir20a | mir93/mir21 | mir93/mir26b | mir93/mir106b | mir93/mir125b | mir93/mir141 | mir93/mir200b | mir93/mir205 | mir93/mir375 | mir93/mir451a |
|------------|-------------|--------------|-------------|--------------|---------------|---------------|--------------|---------------|--------------|--------------|---------------|
| patient 1  | 0.36        | 0.69         | 11.05       | 0.21         | 2.39          | 66.05         | 0.61         | 0.01          | 10.57        | 0.77         | 1.78          |
| patient 2  | 0.34        | 1.39         | 8.37        | 0.65         | 1.54          | 99.82         | 0.88         | 0.00          | 12.44        | 0.62         | 6.00          |
| patient 3  | 0.01        | 0.02         | 9.49        | 0.25         | 71.39         | 109.23        | 0.09         | 10.90         | 0.07         | 2.77         | 61.80         |
| patient 4  | 0.89        | 0.28         | 5.02        | 0.14         | 0.83          | 17.01         | 0.17         | 0.00          | 0.86         | 0.17         | 9.66          |
| patient 5  | 0.07        | 1.15         | 1.73        | 0.45         | 0.01          | 0.97          | 0.57         | 0.48          | 28.91        | 0.15         | 1.63          |
| patient 6  | 1.01        | 0.66         | 1.64        | 0.22         | 0.11          | 0.53          | 0.32         | 0.19          | 13.39        | 0.33         | 13.69         |
| patient 7  | 0.12        | 1.20         | 2.88        | 0.53         | 0.01          | 1.61          | 0.61         | 0.58          | 17.12        | 0.76         | 24.23         |
| patient 8  | 1.78        | 0.61         | 2.18        | 0.15         | 0.01          | 0.21          | 0.12         | 0.06          | 7.34         | 0.09         | 18.25         |
| patient 9  | 0.86        | 0.09         | 2.49        | 0.24         | 0.04          | 0.50          | 0.34         | 0.25          | 7.97         | 0.03         | 7.58          |
| patient 10 | 0.50        | 0.24         | 2.62        | 0.10         | 0.01          | 0.57          | 0.14         | 0.10          | 0.31         | 0.01         | 4.96          |
| patient 11 | 0.48        | 0.11         | 3.24        | 0.22         | 0.01          | 0.97          | 0.23         | 0.22          | 5.62         | 0.00         | 7.25          |
| patient 12 | 0.45        | 0.07         | 3.32        | 0.10         | 0.01          | 0.10          | 0.10         | 0.09          | 2.51         | 0.01         | 7.26          |
| patient 13 | 0.94        | 0.88         | 4.47        | 0.08         | 0.16          | 0.71          | 0.37         | 0.48          | 0.27         | 0.21         | 7.34          |
| patient 14 | 0.89        | 0.65         | 5.55        | 0.03         | 0.51          | 1.94          | 0.96         | 0.86          | 0.80         | 0.05         | 6.07          |
| patient 15 | 0.73        | 0.90         | 3.02        | 0.04         | 0.09          | 71.07         | 0.34         | 0.52          | 0.22         | 0.03         | 3.54          |
| patient 18 | 0.59        | 0.61         | 3.09        | 0.03         | 0.05          | 6.24          | 0.36         | 0.32          | 0.15         | 0.05         | 7.98          |
| patient 19 | 0.73        | 0.56         | 3.44        | 0.34         | 0.02          | 3.62          | 0.29         | 0.49          | 9.84         | 0.39         | 2.71          |
| patient 20 | 0.75        | 1.49         | 2.67        | 0.96         | 0.22          | 1.84          | 0.79         | 0.75          | 27.21        | 0.12         | 10.33         |
| patient 21 | 0.24        | 0.39         | 1.67        | 0.04         | 0.04          | 2.09          | 0.45         | 0.27          | 0.18         | 0.09         | 2.11          |
| patient 23 | 1.61        | 0.05         | 1.57        | 0.19         | 0.10          | 0.77          | 0.22         | 0.34          | 10.49        | 0.02         | 4.06          |
| patient 24 | 0.41        | 0.13         | 0.77        | 0.04         | 0.09          | 0.56          | 0.48         | 0.20          | 0.13         | 0.12         | 0.44          |
| patient 25 | 0.22        | 0.47         | 1.70        | 0.21         | 0.16          | 0.38          | 0.20         | 0.31          | 6.54         | 0.02         | 16.14         |
| patient 26 | 1.56        | 0.16         | 2.66        | 0.03         | 0.08          | 0.24          | 0.40         | 0.03          | 0.10         | 0.05         | 15.82         |
| patient 27 | 0.20        | 0.01         | 1.17        | 0.05         | 0.07          | 1.57          | 0.52         | 0.30          | 0.18         | 0.16         | 2.45          |
| patient 28 | 0.17        | 0.42         | 2.33        | 0.22         | 0.02          | 1.46          | 0.32         | 0.22          | 8.57         | 0.79         | 2.13          |
| patient 29 | 1.68        | 0.62         | 8.24        | 0.23         | 0.16          | 0.76          | 0.44         | 0.06          | 11.89        | 1.56         | 11.70         |
| patient 30 | 2.52        | 0.59         | 1.92        | 0.13         | 0.12          | 0.63          | 0.45         | 0.07          | 10.45        | 0.51         | 9.06          |
| patient 31 | 3.80        | 0.45         | 4.01        | 0.08         | 0.16          | 0.35          | 0.38         | 0.05          | 4.34         | 0.17         | 35.45         |
| patient 32 | 1.71        | 0.30         | 3.35        | 0.05         | 0.13          | 4.96          | 0.38         | 0.46          | 0.34         | 0.04         | 14.18         |
| patient 33 | 1.24        | 0.37         | 3.32        | 0.07         | 0.16          | 8.10          | 0.62         | 0.49          | 0.36         | 0.03         | 15.83         |
| patient 34 | 0.71        | 0.92         | 2.55        | 0.29         | 0.07          | 0.92          | 0.98         | 0.18          | 20.16        | 0.04         | 0.78          |
| patient 36 | 1.14        | 0.62         | 1.91        | 0.66         | 0.14          | 0.83          | 0.86         | 0.24          | 16.61        | 9.20         | 5.10          |
| patient 37 | 0.42        | 0.23         | 3.09        | 0.03         | 0.01          | 5.26          | 1.16         | 0.42          | 0.35         | 0.29         | 1.85          |
| patient 38 | 2.31        | 0.41         | 6.11        | 0.13         | 0.11          | 0.18          | 0.17         | 0.07          | 3.03         | 0.07         | 14.71         |
| patient 39 | 2.75        | 0.50         | 4.61        | 0.18         | 0.11          | 0.43          | 0.26         | 0.11          | 4.35         | 4.27         | 1.59          |
| patient 40 | 3.02        | 0.59         | 5.01        | 0.52         | 0.18          | 0.79          | 1.14         | 0.26          | 13.85        | 0.27         | 5.42          |

|            | mir106b/mir16 | mir106b/mir20a | mir106b/mir21 | mir106b/mir26b | mir106b/mir93 | mir106b/mir125b | mir106b/mir141 | mir106b/mir200b | mir106b/mir205 | mir106b/mir375 | mir106b/mir451a |
|------------|---------------|----------------|---------------|----------------|---------------|-----------------|----------------|-----------------|----------------|----------------|-----------------|
| patient 1  | 0.15          | 0.29           | 4.63          | 0.09           | 0.42          | 27.64           | 0.26           | 0.01            | 4.42           | 0.32           | 0.74            |
| patient 2  | 0.22          | 0.91           | 5.44          | 0.42           | 0.65          | 64.86           | 0.57           | 0.00            | 8.08           | 0.40           | 3.90            |
| patient 3  | 0.00          | 0.00           | 0.13          | 0.00           | 0.01          | 1.53            | 0.00           | 0.15            | 0.00           | 0.04           | 0.87            |
| patient 4  | 1.07          | 0.34           | 6.05          | 0.17           | 1.21          | 20.51           | 0.20           | 0.00            | 1.04           | 0.21           | 11.65           |
| patient 5  | 8.46          | 131.92         | 199.52        | 51.67          | 115.11        | 111.52          | 65.60          | 54.72           | 3327.72        | 17.67          | 187.62          |
| patient 6  | 9.02          | 5.88           | 14.67         | 1.95           | 8.93          | 4.74            | 2.84           | 1.72            | 119.53         | 2.90           | 122.21          |
| patient 7  | 11.43         | 112.59         | 270.21        | 49.34          | 93.68         | 150.41          | 57.60          | 54.23           | 1604.08        | 71.47          | 2269.49         |
| patient 8  | 224.06        | 76.62          | 274.30        | 19.35          | 125.98        | 26.56           | 14.65          | 7.43            | 924.87         | 11.07          | 2298.57         |
| patient 9  | 23.62         | 2.53           | 67.97         | 6.67           | 27.32         | 13.53           | 9.29           | 6.81            | 217.84         | 0.81           | 207.16          |
| patient 10 | 63.08         | 30.03          | 327.92        | 12.93          | 125.04        | 71.22           | 17.06          | 12.56           | 38.89          | 1.56           | 619.63          |
| patient 11 | 53.67         | 12.14          | 358.61        | 24.24          | 110.76        | 107.36          | 25.74          | 23.94           | 623.00         | 0.13           | 802.51          |
| patient 12 | 58.28         | 9.20           | 434.77        | 12.77          | 130.81        | 12.86           | 12.61          | 11.93           | 328.29         | 1.37           | 949.98          |
| patient 13 | 5.93          | 5.53           | 28.22         | 0.50           | 6.32          | 4.45            | 2.31           | 3.02            | 1.73           | 1.32           | 46.38           |
| patient 14 | 1.75          | 1.26           | 10.85         | 0.06           | 1.95          | 3.79            | 1.88           | 1.69            | 1.56           | 0.09           | 11.86           |
| patient 15 | 7.74          | 9.50           | 31.99         | 0.48           | 10.60         | 753.64          | 3.65           | 5.56            | 2.36           | 0.29           | 37.49           |
| patient 18 | 12.38         | 12.92          | 65.31         | 0.60           | 21.16         | 132.06          | 7.62           | 6.71            | 3.13           | 1.11           | 168.91          |
| patient 19 | 33.97         | 26.03          | 160.68        | 16.10          | 46.74         | 169.12          | 13.49          | 22.67           | 460.02         | 18.46          | 126.47          |
| patient 20 | 3.43          | 6.80           | 12.18         | 4.38           | 4.56          | 8.40            | 3.59           | 3.42            | 123.98         | 0.53           | 47.09           |
| patient 21 | 6.17          | 9.80           | 42.08         | 1.02           | 25.25         | 52.69           | 11.46          | 6.94            | 4.44           | 2.27           | 53.19           |
| patient 23 | 16.20         | 0.51           | 15.82         | 1.89           | 10.07         | 7.79            | 2.24           | 3.44            | 105.67         | 0.23           | 40.87           |
| patient 24 | 4.71          | 1.52           | 8.83          | 0.49           | 11.43         | 6.39            | 5.44           | 2.29            | 1.51           | 1.32           | 5.02            |
| patient 25 | 1.39          | 2.95           | 10.69         | 1.29           | 6.27          | 2.36            | 1.24           | 1.94            | 41.02          | 0.10           | 101.29          |
| patient 26 | 20.59         | 2.08           | 35.14         | 0.41           | 13.20         | 3.11            | 5.22           | 0.44            | 1.30           | 0.63           | 208.77          |
| patient 27 | 2.73          | 0.09           | 16.33         | 0.70           | 13.92         | 21.80           | 7.18           | 4.25            | 2.47           | 2.16           | 34.18           |
| patient 28 | 10.25         | 24.66          | 138.33        | 12.81          | 59.28         | 86.84           | 19.06          | 13.25           | 508.18         | 47.09          | 126.44          |
| patient 29 | 10.26         | 3.77           | 50.22         | 1.41           | 6.09          | 4.62            | 2.65           | 0.35            | 72.44          | 9.50           | 71.26           |
| patient 30 | 21.42         | 5.04           | 16.30         | 1.12           | 8.51          | 5.34            | 3.80           | 0.58            | 88.93          | 4.31           | 77.08           |
| patient 31 | 24.07         | 2.84           | 25.43         | 0.50           | 6.34          | 2.19            | 2.39           | 0.34            | 27.49          | 1.07           | 224.62          |
| patient 32 | 12.67         | 2.22           | 24.89         | 0.39           | 7.43          | 36.86           | 2.82           | 3.43            | 2.51           | 0.27           | 105.34          |
| patient 33 | 7.69          | 2.31           | 20.57         | 0.40           | 6.20          | 50.18           | 3.87           | 3.05            | 2.24           | 0.20           | 98.07           |
| patient 34 | 10.90         | 14.14          | 39.25         | 4.48           | 15.36         | 14.12           | 15.06          | 2.72            | 309.66         | 0.59           | 12.03           |
| patient 36 | 8.07          | 4.39           | 13.45         | 4.67           | 7.06          | 5.84            | 6.04           | 1.69            | 117.27         | 64.92          | 36.02           |
| patient 37 | 83.51         | 46.44          | 616.20        | 6.47           | 199.60        | 1050.08         | 231.59         | 84.76           | 69.82          | 57.39          | 369.33          |
| patient 38 | 20.11         | 3.59           | 53.16         | 1.16           | 8.70          | 1.59            | 1.44           | 0.57            | 26.37          | 0.64           | 127.88          |
| patient 39 | 25.02         | 4.51           | 41.98         | 1.62           | 9.11          | 3.88            | 2.35           | 0.97            | 39.63          | 38.92          | 14.44           |
| patient 40 | 17.01         | 3.32           | 28.21         | 2.90           | 5.63          | 4.43            | 6.40           | 1.48            | 77.95          | 1.50           | 30.47           |

|            | mir125b/mir16 | mir125b/mir20a | mir125b/mir21 | mir125b/mir26b | mir125b/mir93 | mir125b/mir106b | mir125b/mir141 | mir125b/mir200b | mir125b/mir205 | mir125b/mir375 | mir125b/mir451a |
|------------|---------------|----------------|---------------|----------------|---------------|-----------------|----------------|-----------------|----------------|----------------|-----------------|
| patient 1  | 0.01          | 0.01           | 0.17          | 0.00           | 0.02          | 0.04            | 0.01           | 0.00            | 0.16           | 0.01           | 0.03            |
| patient 2  | 0.00          | 0.01           | 0.08          | 0.01           | 0.01          | 0.02            | 0.01           | 0.00            | 0.12           | 0.01           | 0.06            |
| patient 3  | 0.00          | 0.00           | 0.09          | 0.00           | 0.01          | 0.65            | 0.00           | 0.10            | 0.00           | 0.03           | 0.57            |
| patient 4  | 0.05          | 0.02           | 0.30          | 0.01           | 0.06          | 0.05            | 0.01           | 0.00            | 0.05           | 0.01           | 0.57            |
| patient 5  | 0.08          | 1.18           | 1.79          | 0.46           | 1.03          | 0.01            | 0.59           | 0.49            | 29.84          | 0.16           | 1.68            |
| patient 6  | 1.90          | 1.24           | 3.10          | 0.41           | 1.88          | 0.21            | 0.60           | 0.36            | 25.22          | 0.61           | 25.78           |
| patient 7  | 0.08          | 0.75           | 1.80          | 0.33           | 0.62          | 0.01            | 0.38           | 0.36            | 10.66          | 0.48           | 15.09           |
| patient 8  | 8.44          | 2.88           | 10.33         | 0.73           | 4.74          | 0.04            | 0.55           | 0.28            | 34.82          | 0.42           | 86.54           |
| patient 9  | 1.75          | 0.19           | 5.02          | 0.49           | 2.02          | 0.07            | 0.69           | 0.50            | 16.10          | 0.06           | 15.31           |
| patient 10 | 0.89          | 0.42           | 4.60          | 0.18           | 1.76          | 0.01            | 0.24           | 0.18            | 0.55           | 0.02           | 8.70            |
| patient 11 | 0.50          | 0.11           | 3.34          | 0.23           | 1.03          | 0.01            | 0.24           | 0.22            | 5.80           | 0.00           | 7.48            |
| patient 12 | 4.53          | 0.72           | 33.81         | 0.99           | 10.17         | 0.08            | 0.98           | 0.93            | 25.53          | 0.11           | 73.88           |
| patient 13 | 1.33          | 1.24           | 6.34          | 0.11           | 1.42          | 0.22            | 0.52           | 0.68            | 0.39           | 0.30           | 10.41           |
| patient 14 | 0.46          | 0.33           | 2.86          | 0.01           | 0.52          | 0.26            | 0.50           | 0.44            | 0.41           | 0.02           | 3.13            |
| patient 15 | 0.01          | 0.01           | 0.04          | 0.00           | 0.01          | 0.00            | 0.00           | 0.01            | 0.00           | 0.00           | 0.05            |
| patient 18 | 0.09          | 0.10           | 0.49          | 0.00           | 0.16          | 0.01            | 0.06           | 0.05            | 0.02           | 0.01           | 1.28            |
| patient 19 | 0.20          | 0.15           | 0.95          | 0.10           | 0.28          | 0.01            | 0.08           | 0.13            | 2.72           | 0.11           | 0.75            |
| patient 20 | 0.41          | 0.81           | 1.45          | 0.52           | 0.54          | 0.12            | 0.43           | 0.41            | 14.76          | 0.06           | 5.61            |
| patient 21 | 0.12          | 0.19           | 0.80          | 0.02           | 0.48          | 0.02            | 0.22           | 0.13            | 0.08           | 0.04           | 1.01            |
| patient 23 | 2.08          | 0.07           | 2.03          | 0.24           | 1.29          | 0.13            | 0.29           | 0.44            | 13.57          | 0.03           | 5.25            |
| patient 24 | 0.74          | 0.24           | 1.38          | 0.08           | 1.79          | 0.16            | 0.85           | 0.36            | 0.24           | 0.21           | 0.79            |
| patient 25 | 0.59          | 1.25           | 4.54          | 0.55           | 2.66          | 0.42            | 0.53           | 0.82            | 17.40          | 0.04           | 42.97           |
| patient 26 | 6.62          | 0.67           | 11.30         | 0.13           | 4.24          | 0.32            | 1.68           | 0.14            | 0.42           | 0.20           | 67.13           |
| patient 27 | 0.13          | 0.00           | 0.75          | 0.03           | 0.64          | 0.05            | 0.33           | 0.19            | 0.11           | 0.10           | 1.57            |
| patient 28 | 0.12          | 0.28           | 1.59          | 0.15           | 0.68          | 0.01            | 0.22           | 0.15            | 5.85           | 0.54           | 1.46            |
| patient 29 | 2.22          | 0.81           | 10.87         | 0.31           | 1.32          | 0.22            | 0.57           | 0.08            | 15.67          | 2.06           | 15.42           |
| patient 30 | 4.01          | 0.94           | 3.05          | 0.21           | 1.59          | 0.19            | 0.71           | 0.11            | 16.66          | 0.81           | 14.44           |
| patient 31 | 10.99         | 1.30           | 11.61         | 0.23           | 2.89          | 0.46            | 1.09           | 0.15            | 12.55          | 0.49           | 102.56          |
| patient 32 | 0.34          | 0.06           | 0.68          | 0.01           | 0.20          | 0.03            | 0.08           | 0.09            | 0.07           | 0.01           | 2.86            |
| patient 33 | 0.15          | 0.05           | 0.41          | 0.01           | 0.12          | 0.02            | 0.08           | 0.06            | 0.04           | 0.00           | 1.95            |
| patient 34 | 0.77          | 1.00           | 2.78          | 0.32           | 1.09          | 0.07            | 1.07           | 0.19            | 21.93          | 0.04           | 0.85            |
| patient 36 | 1.38          | 0.75           | 2.30          | 0.80           | 1.21          | 0.17            | 1.03           | 0.29            | 20.07          | 11.11          | 6.16            |
| patient 37 | 0.08          | 0.04           | 0.59          | 0.01           | 0.19          | 0.00            | 0.22           | 0.08            | 0.07           | 0.05           | 0.35            |
| patient 38 | 12.67         | 2.26           | 33.49         | 0.73           | 5.48          | 0.63            | 0.91           | 0.36            | 16.61          | 0.40           | 80.57           |
| patient 39 | 6.44          | 1.16           | 10.81         | 0.42           | 2.34          | 0.26            | 0.61           | 0.25            | 10.20          | 10.02          | 3.72            |
| patient 40 | 3.84          | 0.75           | 6.37          | 0.65           | 1.27          | 0.23            | 1.45           | 0.33            | 17.60          | 0.34           | 6.88            |

|            | mir141/mir16 | mir141/mir20a | mir141/mir21 | mir141/mir26b | mir141/mir93 | mir141/mir106b | mir141/mir125b | mir141/mir200b | mir141/mir205 | mir141/mir375 | mir141/mir451a |
|------------|--------------|---------------|--------------|---------------|--------------|----------------|----------------|----------------|---------------|---------------|----------------|
| patient 1  | 0.60         | 1.13          | 18.08        | 0.34          | 1.64         | 3.91           | 108.02         | 0.02           | 17.29         | 1.25          | 2.91           |
| patient 2  | 0.39         | 1.58          | 9.49         | 0.74          | 1.13         | 1.75           | 113.21         | 0.00           | 14.10         | 0.71          | 6.80           |
| patient 3  | 0.10         | 0.18          | 101.01       | 2.69          | 10.65        | 759.97         | 1162.87        | 115.99         | 0.78          | 29.44         | 657.90         |
| patient 4  | 5.29         | 1.67          | 29.85        | 0.83          | 5.95         | 4.93           | 101.15         | 0.02           | 5.13          | 1.02          | 57.43          |
| patient 5  | 0.13         | 2.01          | 3.04         | 0.79          | 1.75         | 0.02           | 1.70           | 0.83           | 50.73         | 0.27          | 2.86           |
| patient 6  | 3.17         | 2.07          | 5.16         | 0.69          | 3.14         | 0.35           | 1.67           | 0.60           | 42.03         | 1.02          | 42.97          |
| patient 7  | 0.20         | 1.95          | 4.69         | 0.86          | 1.63         | 0.02           | 2.61           | 0.94           | 27.85         | 1.24          | 39.40          |
| patient 8  | 15.30        | 5.23          | 18.73        | 1.32          | 8.60         | 0.07           | 1.81           | 0.51           | 63.15         | 0.76          | 156.95         |
| patient 9  | 2.54         | 0.27          | 7.32         | 0.72          | 2.94         | 0.11           | 1.46           | 0.73           | 23.46         | 0.09          | 22.31          |
| patient 10 | 3.70         | 1.76          | 19.22        | 0.76          | 7.33         | 0.06           | 4.17           | 0.74           | 2.28          | 0.09          | 36.32          |
| patient 11 | 2.08         | 0.47          | 13.93        | 0.94          | 4.30         | 0.04           | 4.17           | 0.93           | 24.20         | 0.01          | 31.17          |
| patient 12 | 4.62         | 0.73          | 34.47        | 1.01          | 10.37        | 0.08           | 1.02           | 0.95           | 26.03         | 0.11          | 75.32          |
| patient 13 | 2.56         | 2.39          | 12.20        | 0.22          | 2.73         | 0.43           | 1.93           | 1.31           | 0.75          | 0.57          | 20.05          |
| patient 14 | 0.93         | 0.67          | 5.77         | 0.03          | 1.04         | 0.53           | 2.01           | 0.90           | 0.83          | 0.05          | 6.31           |
| patient 15 | 2.12         | 2.60          | 8.76         | 0.13          | 2.90         | 0.27           | 206.36         | 1.52           | 0.65          | 0.08          | 10.27          |
| patient 18 | 1.62         | 1.70          | 8.57         | 0.08          | 2.78         | 0.13           | 17.32          | 0.88           | 0.41          | 0.15          | 22.16          |
| patient 19 | 2.52         | 1.93          | 11.91        | 1.19          | 3.46         | 0.07           | 12.53          | 1.68           | 34.10         | 1.37          | 9.37           |
| patient 20 | 0.95         | 1.89          | 3.39         | 1.22          | 1.27         | 0.28           | 2.34           | 0.95           | 34.54         | 0.15          | 13.12          |
| patient 21 | 0.54         | 0.86          | 3.67         | 0.09          | 2.20         | 0.09           | 4.60           | 0.61           | 0.39          | 0.20          | 4.64           |
| patient 23 | 7.24         | 0.23          | 7.07         | 0.84          | 4.50         | 0.45           | 3.48           | 1.54           | 47.19         | 0.10          | 18.25          |
| patient 24 | 0.87         | 0.28          | 1.62         | 0.09          | 2.10         | 0.18           | 1.17           | 0.42           | 0.28          | 0.24          | 0.92           |
| patient 25 | 1.12         | 2.38          | 8.60         | 1.04          | 5.05         | 0.80           | 1.90           | 1.56           | 33.00         | 0.08          | 81.48          |
| patient 26 | 3.95         | 0.40          | 6.73         | 0.08          | 2.53         | 0.19           | 0.60           | 0.09           | 0.25          | 0.12          | 40.01          |
| patient 27 | 0.38         | 0.01          | 2.27         | 0.10          | 1.94         | 0.14           | 3.04           | 0.59           | 0.34          | 0.30          | 4.76           |
| patient 28 | 0.54         | 1.29          | 7.26         | 0.67          | 3.11         | 0.05           | 4.56           | 0.70           | 26.66         | 2.47          | 6.63           |
| patient 29 | 3.87         | 1.42          | 18.93        | 0.53          | 2.30         | 0.38           | 1.74           | 0.13           | 27.31         | 3.58          | 26.86          |
| patient 30 | 5.64         | 1.33          | 4.29         | 0.29          | 2.24         | 0.26           | 1.41           | 0.15           | 23.43         | 1.13          | 20.31          |
| patient 31 | 10.08        | 1.19          | 10.65        | 0.21          | 2.65         | 0.42           | 0.92           | 0.14           | 11.51         | 0.45          | 94.10          |
| patient 32 | 4.50         | 0.79          | 8.83         | 0.14          | 2.64         | 0.35           | 13.08          | 1.22           | 0.89          | 0.10          | 37.39          |
| patient 33 | 1.99         | 0.60          | 5.31         | 0.10          | 1.60         | 0.26           | 12.96          | 0.79           | 0.58          | 0.05          | 25.34          |
| patient 34 | 0.72         | 0.94          | 2.61         | 0.30          | 1.02         | 0.07           | 0.94           | 0.18           | 20.56         | 0.04          | 0.80           |
| patient 36 | 1.34         | 0.73          | 2.22         | 0.77          | 1.17         | 0.17           | 0.97           | 0.28           | 19.40         | 10.74         | 5.96           |
| patient 37 | 0.36         | 0.20          | 2.66         | 0.03          | 0.86         | 0.00           | 4.53           | 0.37           | 0.30          | 0.25          | 1.59           |
| patient 38 | 13.96        | 2.49          | 36.91        | 0.81          | 6.04         | 0.69           | 1.10           | 0.39           | 18.31         | 0.44          | 88.80          |
| patient 39 | 10.64        | 1.92          | 17.86        | 0.69          | 3.87         | 0.43           | 1.65           | 0.41           | 16.86         | 16.56         | 6.14           |
| patient 40 | 2.66         | 0.52          | 4.41         | 0.45          | 0.88         | 0.16           | 0.69           | 0.23           | 12.17         | 0.23          | 4.76           |

|            | mir200b/mir16 | mir200b/mir20a | mir200b/mir21 | mir200b/mir26b | mir200b/mir93 | mir200b/mir106b | mir200b/mir125b | mir200b/mir141 | mir200b/mir205 | mir200b/mir375 |
|------------|---------------|----------------|---------------|----------------|---------------|-----------------|-----------------|----------------|----------------|----------------|
| patient 1  | 25.99         | 49.33          | 788.28        | 15.04          | 71.31         | 170.40          | 4710.14         | 43.60          | 753.81         | 54.56          |
| patient 2  | 617.31        | 2503.62        | 15029.98      | 1168.89        | 1795.74       | 2763.59         | 179257.03       | 1583.47        | 22334.28       | 1117.49        |
| patient 3  | 0.00          | 0.00           | 0.87          | 0.02           | 0.09          | 6.55            | 10.03           | 0.01           | 0.01           | 0.25           |
| patient 4  | 254.20        | 80.46          | 1434.04       | 40.07          | 285.73        | 236.90          | 4859.44         | 48.04          | 246.29         | 49.24          |
| patient 5  | 0.15          | 2.41           | 3.65          | 0.94           | 2.10          | 0.02            | 2.04            | 1.20           | 60.81          | 0.32           |
| patient 6  | 5.25          | 3.42           | 8.54          | 1.14           | 5.20          | 0.58            | 2.76            | 1.66           | 69.59          | 1.69           |
| patient 7  | 0.21          | 2.08           | 4.98          | 0.91           | 1.73          | 0.02            | 2.77            | 1.06           | 29.58          | 1.32           |
| patient 8  | 30.14         | 10.31          | 36.90         | 2.60           | 16.95         | 0.13            | 3.57            | 1.97           | 124.40         | 1.49           |
| patient 9  | 3.47          | 0.37           | 9.98          | 0.98           | 4.01          | 0.15            | 1.99            | 1.36           | 31.97          | 0.12           |
| patient 10 | 5.02          | 2.39           | 26.11         | 1.03           | 9.95          | 0.08            | 5.67            | 1.36           | 3.10           | 0.12           |
| patient 11 | 2.24          | 0.51           | 14.98         | 1.01           | 4.63          | 0.04            | 4.48            | 1.08           | 26.02          | 0.01           |
| patient 12 | 4.89          | 0.77           | 36.45         | 1.07           | 10.97         | 0.08            | 1.08            | 1.06           | 27.52          | 0.11           |
| patient 13 | 1.96          | 1.83           | 9.34          | 0.16           | 2.09          | 0.33            | 1.47            | 0.77           | 0.57           | 0.44           |
| patient 14 | 1.04          | 0.75           | 6.44          | 0.03           | 1.16          | 0.59            | 2.25            | 1.12           | 0.92           | 0.05           |
| patient 15 | 1.39          | 1.71           | 5.75          | 0.09           | 1.91          | 0.18            | 135.57          | 0.66           | 0.42           | 0.05           |
| patient 18 | 1.85          | 1.93           | 9.73          | 0.09           | 3.15          | 0.15            | 19.68           | 1.14           | 0.47           | 0.17           |
| patient 19 | 1.50          | 1.15           | 7.09          | 0.71           | 2.06          | 0.04            | 7.46            | 0.60           | 20.29          | 0.81           |
| patient 20 | 1.00          | 1.99           | 3.56          | 1.28           | 1.33          | 0.29            | 2.45            | 1.05           | 36.21          | 0.16           |
| patient 21 | 0.89          | 1.41           | 6.06          | 0.15           | 3.64          | 0.14            | 7.59            | 1.65           | 0.64           | 0.33           |
| patient 23 | 4.71          | 0.15           | 4.60          | 0.55           | 2.93          | 0.29            | 2.26            | 0.65           | 30.73          | 0.07           |
| patient 24 | 2.05          | 0.66           | 3.85          | 0.21           | 4.98          | 0.44            | 2.78            | 2.37           | 0.66           | 0.58           |
| patient 25 | 0.72          | 1.52           | 5.51          | 0.66           | 3.23          | 0.52            | 1.22            | 0.64           | 21.15          | 0.05           |
| patient 26 | 46.40         | 4.69           | 79.20         | 0.93           | 29.75         | 2.25            | 7.01            | 11.76          | 2.92           | 1.42           |
| patient 27 | 0.64          | 0.02           | 3.85          | 0.17           | 3.28          | 0.24            | 5.13            | 1.69           | 0.58           | 0.51           |
| patient 28 | 0.77          | 1.86           | 10.44         | 0.97           | 4.47          | 0.08            | 6.55            | 1.44           | 38.35          | 3.55           |
| patient 29 | 29.42         | 10.80          | 144.03        | 4.04           | 17.47         | 2.87            | 13.25           | 7.61           | 207.75         | 27.24          |
| patient 30 | 36.96         | 8.70           | 28.13         | 1.93           | 14.69         | 1.73            | 9.21            | 6.55           | 153.46         | 7.44           |
| patient 31 | 71.07         | 8.40           | 75.08         | 1.47           | 18.71         | 2.95            | 6.47            | 7.05           | 81.16          | 3.15           |
| patient 32 | 3.70          | 0.65           | 7.26          | 0.12           | 2.17          | 0.29            | 10.76           | 0.82           | 0.73           | 0.08           |
| patient 33 | 2.52          | 0.76           | 6.73          | 0.13           | 2.03          | 0.33            | 16.43           | 1.27           | 0.73           | 0.07           |
| patient 34 | 4.01          | 5.21           | 14.45         | 1.65           | 5.66          | 0.37            | 5.20            | 5.54           | 114.00         | 0.22           |
| patient 36 | 4.78          | 2.60           | 7.96          | 2.77           | 4.18          | 0.59            | 3.46            | 3.58           | 69.45          | 38.44          |
| patient 37 | 0.99          | 0.55           | 7.27          | 0.08           | 2.36          | 0.01            | 12.39           | 2.73           | 0.82           | 0.68           |
| patient 38 | 35.43         | 6.33           | 93.67         | 2.04           | 15.32         | 1.76            | 2.80            | 2.54           | 46.46          | 1.12           |
| patient 39 | 25.73         | 4.64           | 43.18         | 1.66           | 9.37          | 1.03            | 4.00            | 2.42           | 40.76          | 40.03          |
| patient 40 | 11.48         | 2.24           | 19.03         | 1.96           | 3.80          | 0.67            | 2.99            | 4.32           | 52.60          | 1.01           |

|            | mir205/mir16 | mir205/mir20a | mir205/mir21 | mir205/mir26b | mir205/mir93 | mir205/mir106b | mir205/mir125b | mir205/mir141 | mir205/mir200b | mir205/mir375 | mir205/mir451a |
|------------|--------------|---------------|--------------|---------------|--------------|----------------|----------------|---------------|----------------|---------------|----------------|
| patient 1  | 0.03         | 0.07          | 1.05         | 0.02          | 0.09         | 0.23           | 6.25           | 0.06          | 0.00           | 0.07          | 0.17           |
| patient 2  | 0.03         | 0.11          | 0.67         | 0.05          | 0.08         | 0.12           | 8.03           | 0.07          | 0.00           | 0.05          | 0.48           |
| patient 3  | 0.13         | 0.23          | 128.74       | 3.43          | 13.57        | 968.63         | 1482.16        | 1.27          | 147.84         | 37.53         | 838.53         |
| patient 4  | 1.03         | 0.33          | 5.82         | 0.16          | 1.16         | 0.96           | 19.73          | 0.20          | 0.00           | 0.20          | 11.20          |
| patient 5  | 0.00         | 0.04          | 0.06         | 0.02          | 0.03         | 0.00           | 0.03           | 0.02          | 0.02           | 0.01          | 0.06           |
| patient 6  | 0.08         | 0.05          | 0.12         | 0.02          | 0.07         | 0.01           | 0.04           | 0.02          | 0.01           | 0.02          | 1.02           |
| patient 7  | 0.01         | 0.07          | 0.17         | 0.03          | 0.06         | 0.00           | 0.09           | 0.04          | 0.03           | 0.04          | 1.41           |
| patient 8  | 0.24         | 0.08          | 0.30         | 0.02          | 0.14         | 0.00           | 0.03           | 0.02          | 0.01           | 0.01          | 2.49           |
| patient 9  | 0.11         | 0.01          | 0.31         | 0.03          | 0.13         | 0.00           | 0.06           | 0.04          | 0.03           | 0.00          | 0.95           |
| patient 10 | 1.62         | 0.77          | 8.43         | 0.33          | 3.22         | 0.03           | 1.83           | 0.44          | 0.32           | 0.04          | 15.93          |
| patient 11 | 0.09         | 0.02          | 0.58         | 0.04          | 0.18         | 0.00           | 0.17           | 0.04          | 0.04           | 0.00          | 1.29           |
| patient 12 | 0.18         | 0.03          | 1.32         | 0.04          | 0.40         | 0.00           | 0.04           | 0.04          | 0.04           | 0.00          | 2.89           |
| patient 13 | 3.43         | 3.20          | 16.33        | 0.29          | 3.65         | 0.58           | 2.58           | 1.34          | 1.75           | 0.76          | 26.83          |
| patient 14 | 1.12         | 0.81          | 6.97         | 0.04          | 1.26         | 0.64           | 2.44           | 1.21          | 1.08           | 0.06          | 7.63           |
| patient 15 | 3.28         | 4.03          | 13.55        | 0.20          | 4.49         | 0.42           | 319.27         | 1.55          | 2.36           | 0.12          | 15.88          |
| patient 18 | 3.96         | 4.13          | 20.87        | 0.19          | 6.76         | 0.32           | 42.21          | 2.44          | 2.14           | 0.36          | 53.98          |
| patient 19 | 0.07         | 0.06          | 0.35         | 0.04          | 0.10         | 0.00           | 0.37           | 0.03          | 0.05           | 0.04          | 0.27           |
| patient 20 | 0.03         | 0.05          | 0.10         | 0.04          | 0.04         | 0.01           | 0.07           | 0.03          | 0.03           | 0.00          | 0.38           |
| patient 21 | 1.39         | 2.21          | 9.49         | 0.23          | 5.69         | 0.23           | 11.88          | 2.58          | 1.56           | 0.51          | 11.99          |
| patient 23 | 0.15         | 0.00          | 0.15         | 0.02          | 0.10         | 0.01           | 0.07           | 0.02          | 0.03           | 0.00          | 0.39           |
| patient 24 | 3.12         | 1.00          | 5.84         | 0.33          | 7.56         | 0.66           | 4.23           | 3.60          | 1.52           | 0.88          | 3.32           |
| patient 25 | 0.03         | 0.07          | 0.26         | 0.03          | 0.15         | 0.02           | 0.06           | 0.03          | 0.05           | 0.00          | 2.47           |
| patient 26 | 15.88        | 1.60          | 27.11        | 0.32          | 10.18        | 0.77           | 2.40           | 4.03          | 0.34           | 0.49          | 161.07         |
| patient 27 | 1.11         | 0.04          | 6.62         | 0.28          | 5.64         | 0.41           | 8.84           | 2.91          | 1.72           | 0.88          | 13.85          |
| patient 28 | 0.02         | 0.05          | 0.27         | 0.03          | 0.12         | 0.00           | 0.17           | 0.04          | 0.03           | 0.09          | 0.25           |
| patient 29 | 0.14         | 0.05          | 0.69         | 0.02          | 0.08         | 0.01           | 0.06           | 0.04          | 0.00           | 0.13          | 0.98           |
| patient 30 | 0.24         | 0.06          | 0.18         | 0.01          | 0.10         | 0.01           | 0.06           | 0.04          | 0.01           | 0.05          | 0.87           |
| patient 31 | 0.88         | 0.10          | 0.93         | 0.02          | 0.23         | 0.04           | 0.08           | 0.09          | 0.01           | 0.04          | 8.17           |
| patient 32 | 5.05         | 0.88          | 9.91         | 0.16          | 2.96         | 0.40           | 14.68          | 1.12          | 1.36           | 0.11          | 41.95          |
| patient 33 | 3.43         | 1.03          | 9.18         | 0.18          | 2.77         | 0.45           | 22.41          | 1.73          | 1.36           | 0.09          | 43.79          |
| patient 34 | 0.04         | 0.05          | 0.13         | 0.01          | 0.05         | 0.00           | 0.05           | 0.05          | 0.01           | 0.00          | 0.04           |
| patient 36 | 0.07         | 0.04          | 0.11         | 0.04          | 0.06         | 0.01           | 0.05           | 0.05          | 0.01           | 0.55          | 0.31           |
| patient 37 | 1.20         | 0.67          | 8.83         | 0.09          | 2.86         | 0.01           | 15.04          | 3.32          | 1.21           | 0.82          | 5.29           |
| patient 38 | 0.76         | 0.14          | 2.02         | 0.04          | 0.33         | 0.04           | 0.06           | 0.05          | 0.02           | 0.02          | 4.85           |
| patient 39 | 0.63         | 0.11          | 1.06         | 0.04          | 0.23         | 0.03           | 0.10           | 0.06          | 0.02           | 0.98          | 0.36           |
| patient 40 | 0.22         | 0.04          | 0.36         | 0.04          | 0.07         | 0.01           | 0.06           | 0.08          | 0.02           | 0.02          | 0.39           |



|            | mir375/mir16 | mir375/mir20a | mir375/mir21 | mir375/mir26b | mir375/mir93 | mir375/mir106b | mir375/mir125b | mir375/mir141 | mir375/mir200b | mir375/mir205 | mir375/mir451a |
|------------|--------------|---------------|--------------|---------------|--------------|----------------|----------------|---------------|----------------|---------------|----------------|
| patient 1  | 0.48         | 0.90          | 14.45        | 0.28          | 1.31         | 3.12           | 86.32          | 0.80          | 0.02           | 13.82         | 2.33           |
| patient 2  | 0.55         | 2.24          | 13.45        | 1.05          | 1.61         | 2.47           | 160.41         | 1.42          | 0.00           | 19.99         | 9.64           |
| patient 3  | 0.00         | 0.01          | 3.43         | 0.09          | 0.36         | 25.81          | 39.49          | 0.03          | 3.94           | 0.03          | 22.34          |
| patient 4  | 5.16         | 1.63          | 29.12        | 0.81          | 5.80         | 4.81           | 98.69          | 0.98          | 0.02           | 5.00          | 56.03          |
| patient 5  | 0.48         | 7.47          | 11.29        | 2.92          | 6.51         | 0.06           | 6.31           | 3.71          | 3.10           | 188.33        | 10.62          |
| patient 6  | 3.11         | 2.02          | 5.05         | 0.67          | 3.07         | 0.34           | 1.63           | 0.98          | 0.59           | 41.16         | 42.09          |
| patient 7  | 0.16         | 1.58          | 3.78         | 0.69          | 1.31         | 0.01           | 2.10           | 0.81          | 0.76           | 22.44         | 31.75          |
| patient 8  | 20.24        | 6.92          | 24.77        | 1.75          | 11.38        | 0.09           | 2.40           | 1.32          | 0.67           | 83.53         | 207.61         |
| patient 9  | 29.00        | 3.10          | 83.47        | 8.19          | 33.54        | 1.23           | 16.61          | 11.40         | 8.37           | 267.51        | 254.39         |
| patient 10 | 40.35        | 19.20         | 209.74       | 8.27          | 79.97        | 0.64           | 45.55          | 10.91         | 8.03           | 24.87         | 396.31         |
| patient 11 | 409.94       | 92.75         | 2739.32      | 185.17        | 846.06       | 7.64           | 820.07         | 196.65        | 182.91         | 4758.96       | 6130.15        |
| patient 12 | 42.56        | 6.72          | 317.53       | 9.33          | 95.54        | 0.73           | 9.39           | 9.21          | 8.71           | 239.77        | 693.81         |
| patient 13 | 4.50         | 4.20          | 21.41        | 0.38          | 4.79         | 0.76           | 3.38           | 1.75          | 2.29           | 1.31          | 35.18          |
| patient 14 | 19.69        | 14.20         | 122.23       | 0.64          | 22.01        | 11.27          | 42.70          | 21.20         | 18.99          | 17.53         | 133.68         |
| patient 15 | 26.77        | 32.88         | 110.65       | 1.65          | 36.68        | 3.46           | 2606.94        | 12.63         | 19.23          | 8.17          | 129.69         |
| patient 18 | 11.11        | 11.59         | 58.59        | 0.54          | 18.98        | 0.90           | 118.47         | 6.84          | 6.02           | 2.81          | 151.53         |
| patient 19 | 1.84         | 1.41          | 8.71         | 0.87          | 2.53         | 0.05           | 9.16           | 0.73          | 1.23           | 24.93         | 6.85           |
| patient 20 | 6.45         | 12.80         | 22.94        | 8.25          | 8.58         | 1.88           | 15.81          | 6.76          | 6.45           | 233.43        | 88.66          |
| patient 21 | 2.72         | 4.32          | 18.53        | 0.45          | 11.12        | 0.44           | 23.21          | 5.05          | 3.06           | 1.95          | 23.43          |
| patient 23 | 68.96        | 2.17          | 67.34        | 8.05          | 42.86        | 4.26           | 33.14          | 9.53          | 14.64          | 449.76        | 173.94         |
| patient 24 | 3.56         | 1.15          | 6.67         | 0.37          | 8.63         | 0.76           | 4.82           | 4.11          | 1.73           | 1.14          | 3.79           |
| patient 25 | 14.57        | 31.00         | 112.19       | 13.52         | 65.83        | 10.49          | 24.73          | 13.04         | 20.35          | 430.39        | 1062.74        |
| patient 26 | 32.67        | 3.30          | 55.76        | 0.65          | 20.94        | 1.59           | 4.93           | 8.28          | 0.70           | 2.06          | 331.26         |
| patient 27 | 1.26         | 0.04          | 7.55         | 0.33          | 6.44         | 0.46           | 10.08          | 3.32          | 1.96           | 1.14          | 15.80          |
| patient 28 | 0.22         | 0.52          | 2.94         | 0.27          | 1.26         | 0.02           | 1.84           | 0.40          | 0.28           | 10.79         | 2.69           |
| patient 29 | 1.08         | 0.40          | 5.29         | 0.15          | 0.64         | 0.11           | 0.49           | 0.28          | 0.04           | 7.63          | 7.50           |
| patient 30 | 4.97         | 1.17          | 3.78         | 0.26          | 1.98         | 0.23           | 1.24           | 0.88          | 0.13           | 20.64         | 17.89          |
| patient 31 | 22.53        | 2.66          | 23.80        | 0.47          | 5.93         | 0.94           | 2.05           | 2.23          | 0.32           | 25.73         | 210.28         |
| patient 32 | 46.98        | 8.23          | 92.26        | 1.46          | 27.54        | 3.71           | 136.64         | 10.44         | 12.70          | 9.31          | 390.48         |
| patient 33 | 38.51        | 11.57         | 102.99       | 2.03          | 31.03        | 5.01           | 251.25         | 19.38         | 15.29          | 11.21         | 491.07         |
| patient 34 | 18.60        | 24.13         | 66.95        | 7.65          | 26.20        | 1.71           | 24.09          | 25.69         | 4.63           | 528.23        | 20.51          |
| patient 36 | 0.12         | 0.07          | 0.21         | 0.07          | 0.11         | 0.02           | 0.09           | 0.09          | 0.03           | 1.81          | 0.55           |
| patient 37 | 1.46         | 0.81          | 10.74        | 0.11          | 3.48         | 0.02           | 18.30          | 4.04          | 1.48           | 1.22          | 6.44           |
| patient 38 | 31.49        | 5.62          | 83.27        | 1.82          | 13.62        | 1.57           | 2.49           | 2.26          | 0.89           | 41.30         | 200.31         |
| patient 39 | 0.64         | 0.12          | 1.08         | 0.04          | 0.23         | 0.03           | 0.10           | 0.06          | 0.02           | 1.02          | 0.37           |
| patient 40 | 11.36        | 2.22          | 18.83        | 1.94          | 3.76         | 0.67           | 2.96           | 4.27          | 0.99           | 52.03         | 20.34          |

|            | mir451a/mir16 | mir451a/mir20a | mir451a/mir21 | mir451a/mir26b | mir451a/mir93 | mir451a/mir106b | mir451a/mir125b | mir451a/mir141 | mir451a/mir200b | mir451a/mir205 | mir451a/mir375 |
|------------|---------------|----------------|---------------|----------------|---------------|-----------------|-----------------|----------------|-----------------|----------------|----------------|
| patient 1  | 0.20          | 0.39           | 6.21          | 0.12           | 0.56          | 1.34            | 37.12           | 0.34           | 0.01            | 5.94           | 0.43           |
| patient 2  | 0.06          | 0.23           | 1.40          | 0.11           | 0.17          | 0.26            | 16.65           | 0.15           | 0.00            | 2.07           | 0.10           |
| patient 3  | 0.00          | 0.00           | 0.15          | 0.00           | 0.02          | 1.16            | 1.77            | 0.00           | 0.18            | 0.00           | 0.04           |
| patient 4  | 0.09          | 0.03           | 0.52          | 0.01           | 0.10          | 0.09            | 1.76            | 0.02           | 0.00            | 0.09           | 0.02           |
| patient 5  | 0.05          | 0.70           | 1.06          | 0.28           | 0.61          | 0.01            | 0.59            | 0.35           | 0.29            | 17.74          | 0.09           |
| patient 6  | 0.07          | 0.05           | 0.12          | 0.02           | 0.07          | 0.01            | 0.04            | 0.02           | 0.01            | 0.98           | 0.02           |
| patient 7  | 0.01          | 0.05           | 0.12          | 0.02           | 0.04          | 0.00            | 0.07            | 0.03           | 0.02            | 0.71           | 0.03           |
| patient 8  | 0.10          | 0.03           | 0.12          | 0.01           | 0.05          | 0.00            | 0.01            | 0.01           | 0.00            | 0.40           | 0.00           |
| patient 9  | 0.11          | 0.01           | 0.33          | 0.03           | 0.13          | 0.00            | 0.07            | 0.04           | 0.03            | 1.05           | 0.00           |
| patient 10 | 0.10          | 0.05           | 0.53          | 0.02           | 0.20          | 0.00            | 0.11            | 0.03           | 0.02            | 0.06           | 0.00           |
| patient 11 | 0.07          | 0.02           | 0.45          | 0.03           | 0.14          | 0.00            | 0.13            | 0.03           | 0.03            | 0.78           | 0.00           |
| patient 12 | 0.06          | 0.01           | 0.46          | 0.01           | 0.14          | 0.00            | 0.01            | 0.01           | 0.01            | 0.35           | 0.00           |
| patient 13 | 0.13          | 0.12           | 0.61          | 0.01           | 0.14          | 0.02            | 0.10            | 0.05           | 0.07            | 0.04           | 0.03           |
| patient 14 | 0.15          | 0.11           | 0.91          | 0.00           | 0.16          | 0.08            | 0.32            | 0.16           | 0.14            | 0.13           | 0.01           |
| patient 15 | 0.21          | 0.25           | 0.85          | 0.01           | 0.28          | 0.03            | 20.10           | 0.10           | 0.15            | 0.06           | 0.01           |
| patient 18 | 0.07          | 0.08           | 0.39          | 0.00           | 0.13          | 0.01            | 0.78            | 0.05           | 0.04            | 0.02           | 0.01           |
| patient 19 | 0.27          | 0.21           | 1.27          | 0.13           | 0.37          | 0.01            | 1.34            | 0.11           | 0.18            | 3.64           | 0.15           |
| patient 20 | 0.07          | 0.14           | 0.26          | 0.09           | 0.10          | 0.02            | 0.18            | 0.08           | 0.07            | 2.63           | 0.01           |
| patient 21 | 0.12          | 0.18           | 0.79          | 0.02           | 0.47          | 0.02            | 0.99            | 0.22           | 0.13            | 0.08           | 0.04           |
| patient 23 | 0.40          | 0.01           | 0.39          | 0.05           | 0.25          | 0.02            | 0.19            | 0.05           | 0.08            | 2.59           | 0.01           |
| patient 24 | 0.94          | 0.30           | 1.76          | 0.10           | 2.28          | 0.20            | 1.27            | 1.08           | 0.46            | 0.30           | 0.26           |
| patient 25 | 0.01          | 0.03           | 0.11          | 0.01           | 0.06          | 0.01            | 0.02            | 0.01           | 0.02            | 0.40           | 0.00           |
| patient 26 | 0.10          | 0.01           | 0.17          | 0.00           | 0.06          | 0.00            | 0.01            | 0.02           | 0.00            | 0.01           | 0.00           |
| patient 27 | 0.08          | 0.00           | 0.48          | 0.02           | 0.41          | 0.03            | 0.64            | 0.21           | 0.12            | 0.07           | 0.06           |
| patient 28 | 0.08          | 0.20           | 1.09          | 0.10           | 0.47          | 0.01            | 0.69            | 0.15           | 0.10            | 4.02           | 0.37           |
| patient 29 | 0.14          | 0.05           | 0.70          | 0.02           | 0.09          | 0.01            | 0.06            | 0.04           | 0.00            | 1.02           | 0.13           |
| patient 30 | 0.28          | 0.07           | 0.21          | 0.01           | 0.11          | 0.01            | 0.07            | 0.05           | 0.01            | 1.15           | 0.06           |
| patient 31 | 0.11          | 0.01           | 0.11          | 0.00           | 0.03          | 0.00            | 0.01            | 0.01           | 0.00            | 0.12           | 0.00           |
| patient 32 | 0.12          | 0.02           | 0.24          | 0.00           | 0.07          | 0.01            | 0.35            | 0.03           | 0.03            | 0.02           | 0.00           |
| patient 33 | 0.08          | 0.02           | 0.21          | 0.00           | 0.06          | 0.01            | 0.51            | 0.04           | 0.03            | 0.02           | 0.00           |
| patient 34 | 0.91          | 1.18           | 3.26          | 0.37           | 1.28          | 0.08            | 1.17            | 1.25           | 0.23            | 25.75          | 0.05           |
| patient 36 | 0.22          | 0.12           | 0.37          | 0.13           | 0.20          | 0.03            | 0.16            | 0.17           | 0.05            | 3.26           | 1.80           |
| patient 37 | 0.23          | 0.13           | 1.67          | 0.02           | 0.54          | 0.00            | 2.84            | 0.63           | 0.23            | 0.19           | 0.16           |
| patient 38 | 0.16          | 0.03           | 0.42          | 0.01           | 0.07          | 0.01            | 0.01            | 0.01           | 0.00            | 0.21           | 0.00           |
| patient 39 | 1.73          | 0.31           | 2.91          | 0.11           | 0.63          | 0.07            | 0.27            | 0.16           | 0.07            | 2.74           | 2.70           |
| patient 40 | 0.56          | 0.11           | 0.93          | 0.10           | 0.18          | 0.03            | 0.15            | 0.21           | 0.05            | 2.56           | 0.05           |

|          | mir16/mir20a | mir16/mir21  | mir16/mir26b  | mir16/mir93  | mir16/mir106b  | mir16/mir125b  | mir16/mir141  | mir16/mir200b  | mir16/mir205  | mir16/mir375  | mir16/mir451a  |
|----------|--------------|--------------|---------------|--------------|----------------|----------------|---------------|----------------|---------------|---------------|----------------|
| donor 1  | 0.27         | 3.97         | 0.05          | 0.75         | 0.02           | 0.00           | 0.00          | 0.19           | 0.70          | 1.03          | 15.72          |
| donor 2  | 0.31         | 6.56         | 0.08          | 2.23         | 0.04           | 0.01           | 0.02          | 0.29           | 0.59          | 0.50          | 12.20          |
| donor 3  | 0.37         | 4.19         | 0.13          | 1.17         | 0.05           | 0.03           | 0.00          | 0.28           | 0.75          | 1.47          | 21.42          |
| donor 4  | 0.35         | 6.05         | 0.14          | 1.60         | 0.17           | 0.00           | 0.00          | 0.31           | 0.55          | 1.11          | 15.31          |
| donor 5  | 0.20         | 1.44         | 0.04          | 0.46         | 0.04           | 0.46           | 0.17          | 0.04           | 0.09          | 0.67          | 9.81           |
| donor 6  | 0.30         | 2.52         | 0.13          | 0.37         | 0.89           | 0.95           | 0.12          | 0.21           | 0.09          | 0.41          | 3.80           |
| donor 7  | 0.48         | 2.80         | 0.10          | 0.61         | 0.10           | 1.66           | 0.28          | 0.15           | 0.17          | 0.36          | 9.53           |
| donor 8  | 21.07        | 197.80       | 5.43          | 61.40        | 0.18           | 86.39          | 27.56         | 8.73           | 15.78         | 40.39         | 299.52         |
| donor 9  | 0.09         | 4.18         | 0.04          | 0.27         | 0.00           | 0.90           | 0.49          | 0.11           | 0.26          | 0.52          | 4.98           |
| donor 10 | 0.34         | 8.32         | 0.05          | 0.85         | 0.01           | 10.03          | 2.84          | 0.72           | 2.39          | 0.22          | 6.39           |
| donor 11 | 0.22         | 3.51         | 0.04          | 0.94         | 0.01           | 3.19           | 2.21          | 0.32           | 0.91          | 2.13          | 8.30           |
| donor 12 | 0.15         | 3.55         | 0.10          | 0.55         | 1485.73        | 2.97           | 7.81          | 0.09           | 0.46          | 0.20          | 7.65           |
| donor 13 | 0.34         | 6.42         | 0.02          | 3.38         | 0.07           | 0.88           | 0.35          | 0.91           | 1.32          | 3.24          | 6.45           |
| donor 14 | 10.50        | 269.20       | 1.19          | 157.66       | 38.96          | 40.05          | 19.23         | 65.79          | 50.31         | 23.76         | 114.87         |
| donor 15 | 0.48         | 5.55         | 0.11          | 3.50         | 1.49           | 2.44           | 0.95          | 1.63           | 2.50          | 4.61          | 0.30           |
| donor 16 | 0.51         | 9.48         | 0.11          | 4.83         | 1.63           | 1.47           | 0.99          | 1.81           | 2.03          | 7.03          | 11.69          |
| donor 17 | 0.94         | 7.56         | 0.32          | 12.08        | 4.88           | 1.79           | 1.46          | 3.46           | 2.40          | 2.51          | 3.10           |
| donor 18 | 0.34         | 9.95         | 0.28          | 7.48         | 8.67           | 2.82           | 1.18          | 3.33           | 3.12          | 5.52          | 6.58           |
|          | mir20a/mir16 | mir20a/mir21 | mir20a/mir26b | mir20a/mir93 | mir20a/mir106b | mir20a/mir125b | mir20a/mir141 | mir20a/mir200b | mir20a/mir205 | mir20a/mir375 | mir20a/mir451a |
| donor 1  | 3.73         | 14.80        | 0.17          | 2.80         | 0.07           | 0.01           | 0.00          | 0.72           | 2.60          | 3.86          | 58.58          |
| donor 2  | 3.26         | 21.38        | 0.26          | 7.26         | 0.14           | 0.02           | 0.06          | 0.94           | 1.91          | 1.63          | 39.78          |
| donor 3  | 2.68         | 11.23        | 0.36          | 3.15         | 0.13           | 0.07           | 0.00          | 0.75           | 2.01          | 3.94          | 57.40          |
| donor 4  | 2.87         | 17.35        | 0.41          | 4.58         | 0.50           | 0.01           | 0.00          | 0.90           | 1.59          | 3.19          | 43.88          |
| donor 5  | 5.00         | 7.22         | 0.20          | 2.30         | 0.19           | 2.28           | 0.83          | 0.20           | 0.43          | 3.36          | 49.05          |
| donor 6  | 3.36         | 8.45         | 0.45          | 1.24         | 2.98           | 3.19           | 0.41          | 0.71           | 0.30          | 1.36          | 12.76          |
| donor 7  | 2.07         | 5.79         | 0.21          | 1.26         | 0.20           | 3.44           | 0.58          | 0.31           | 0.35          | 0.74          | 19.74          |
| donor 8  | 0.05         | 9.39         | 0.26          | 2.91         | 0.01           | 4.10           | 1.31          | 0.41           | 0.75          | 1.92          | 14.21          |
| donor 9  | 11.65        | 48.74        | 0.41          | 3.09         | 0.03           | 10.49          | 5.69          | 1.28           | 3.00          | 6.09          | 58.00          |
| donor 10 | 2.96         | 24.60        | 0.14          | 2.50         | 0.03           | 29.66          | 8.39          | 2.13           | 7.07          | 0.65          | 18.89          |
| donor 11 | 4.51         | 15.81        | 0.20          | 4.26         | 0.03           | 14.37          | 9.97          | 1.43           | 4.11          | 9.62          | 37.41          |
| donor 12 | 6.62         | 23.54        | 0.69          | 3.63         | 9840.03        | 19.65          | 51.70         | 0.61           | 3.05          | 1.36          | 50.70          |
| donor 13 | 2.92         | 18.73        | 0.05          | 9.87         | 0.21           | 2.58           | 1.03          | 2.65           | 3.85          | 9.46          | 18.82          |
| donor 14 | 0.10         | 25.63        | 0.11          | 15.01        | 3.71           | 3.81           | 1.83          | 6.26           | 4.79          | 2.26          | 10.94          |
| donor 15 | 2.08         | 11.56        | 0.24          | 7.29         | 3.11           | 5.07           | 1.98          | 3.39           | 5.21          | 9.59          | 0.63           |
| donor 16 | 1.95         | 18.44        | 0.22          | 9.39         | 3.16           | 2.86           | 1.93          | 3.52           | 3.94          | 13.69         | 22.76          |
| donor 17 | 1.07         | 8.08         | 0.34          | 12.92        | 5.22           | 1.91           | 1.56          | 3.70           | 2.57          | 2.69          | 3.32           |
| donor 18 | 2.92         | 29.11        | 0.82          | 21.86        | 25.35          | 8.26           | 3.45          | 9.75           | 9.13          | 16.13         | 19.25          |

|          | mir21/mir16  | mir21/mir20a  | mir21/mir26b | mir21/mir93  | mir21/mir106b  | mir21/mir125b  | mir21/mir141  | mir21/mir200b  | mir21/mir205  | mir21/mir375  | mir21/mir451a  |
|----------|--------------|---------------|--------------|--------------|----------------|----------------|---------------|----------------|---------------|---------------|----------------|
| donor 1  | 0.25         | 0.07          | 0.01         | 0.19         | 0.01           | 0.00           | 0.00          | 0.05           | 0.18          | 0.26          | 3.96           |
| donor 2  | 0.15         | 0.05          | 0.01         | 0.34         | 0.01           | 0.00           | 0.00          | 0.04           | 0.09          | 0.08          | 1.86           |
| donor 3  | 0.24         | 0.09          | 0.03         | 0.28         | 0.01           | 0.01           | 0.00          | 0.07           | 0.18          | 0.35          | 5.11           |
| donor 4  | 0.17         | 0.06          | 0.02         | 0.26         | 0.03           | 0.00           | 0.00          | 0.05           | 0.09          | 0.18          | 2.53           |
| donor 5  | 0.69         | 0.14          | 0.03         | 0.32         | 0.03           | 0.32           | 0.11          | 0.03           | 0.06          | 0.47          | 6.80           |
| donor 6  | 0.40         | 0.12          | 0.05         | 0.15         | 0.35           | 0.38           | 0.05          | 0.08           | 0.04          | 0.16          | 1.51           |
| donor 7  | 0.36         | 0.17          | 0.04         | 0.22         | 0.04           | 0.59           | 0.10          | 0.05           | 0.06          | 0.13          | 3.41           |
| donor 8  | 0.01         | 0.11          | 0.03         | 0.31         | 0.00           | 0.44           | 0.14          | 0.04           | 0.08          | 0.20          | 1.51           |
| donor 9  | 0.24         | 0.02          | 0.01         | 0.06         | 0.00           | 0.22           | 0.12          | 0.03           | 0.06          | 0.12          | 1.19           |
| donor 10 | 0.12         | 0.04          | 0.01         | 0.10         | 0.00           | 1.21           | 0.34          | 0.09           | 0.29          | 0.03          | 0.77           |
| donor 11 | 0.29         | 0.06          | 0.01         | 0.27         | 0.00           | 0.91           | 0.63          | 0.09           | 0.26          | 0.61          | 2.37           |
| donor 12 | 0.28         | 0.04          | 0.03         | 0.15         | 417.97         | 0.83           | 2.20          | 0.03           | 0.13          | 0.06          | 2.15           |
| donor 13 | 0.16         | 0.05          | 0.00         | 0.53         | 0.01           | 0.14           | 0.06          | 0.14           | 0.21          | 0.50          | 1.00           |
| donor 14 | 0.00         | 0.04          | 0.00         | 0.59         | 0.14           | 0.15           | 0.07          | 0.24           | 0.19          | 0.09          | 0.43           |
| donor 15 | 0.18         | 0.09          | 0.02         | 0.63         | 0.27           | 0.44           | 0.17          | 0.29           | 0.45          | 0.83          | 0.05           |
| donor 16 | 0.11         | 0.05          | 0.01         | 0.51         | 0.17           | 0.15           | 0.10          | 0.19           | 0.21          | 0.74          | 1.23           |
| donor 17 | 0.13         | 0.12          | 0.04         | 1.60         | 0.65           | 0.24           | 0.19          | 0.46           | 0.32          | 0.33          | 0.41           |
| donor 18 | 0.10         | 0.03          | 0.03         | 0.75         | 0.87           | 0.28           | 0.12          | 0.33           | 0.31          | 0.55          | 0.66           |
|          | mir26b/mir16 | mir26b/mir20a | mir26b/mir21 | mir26b/mir93 | mir26b/mir106b | mir26b/mir125b | mir26b/mir141 | mir26b/mir200b | mir26b/mir205 | mir26b/mir375 | mir26b/mir451a |
| donor 1  | 21.88        | 5.87          | 86.91        | 16.47        | 0.44           | 0.07           | 0.02          | 4.25           | 15.28         | 22.64         | 343.91         |
| donor 2  | 12.51        | 3.84          | 82.04        | 27.86        | 0.53           | 0.09           | 0.24          | 3.61           | 7.32          | 6.24          | 152.67         |
| donor 3  | 7.50         | 2.80          | 31.42        | 8.81         | 0.37           | 0.19           | 0.01          | 2.11           | 5.61          | 11.01         | 160.61         |
| donor 4  | 7.02         | 2.45          | 42.46        | 11.22        | 1.22           | 0.03           | 0.00          | 2.19           | 3.89          | 7.81          | 107.39         |
| donor 5  | 25.07        | 5.01          | 36.19        | 11.52        | 0.95           | 11.46          | 4.15          | 1.02           | 2.16          | 16.86         | 245.96         |
| donor 6  | 7.54         | 2.24          | 18.98        | 2.79         | 6.68           | 7.17           | 0.91          | 1.59           | 0.67          | 3.06          | 28.65          |
| donor 7  | 10.10        | 4.87          | 28.23        | 6.13         | 0.99           | 16.78          | 2.81          | 1.53           | 1.70          | 3.62          | 96.22          |
| donor 8  | 0.18         | 3.88          | 36.45        | 11.31        | 0.03           | 15.92          | 5.08          | 1.61           | 2.91          | 7.44          | 55.20          |
| donor 9  | 28.25        | 2.43          | 118.24       | 7.51         | 0.08           | 25.44          | 13.80         | 3.11           | 7.28          | 14.76         | 140.69         |
| donor 10 | 20.65        | 6.98          | 171.76       | 17.46        | 0.22           | 207.06         | 58.55         | 14.86          | 49.37         | 4.54          | 131.87         |
| donor 11 | 22.50        | 4.99          | 78.88        | 21.25        | 0.13           | 71.70          | 49.73         | 7.15           | 20.53         | 48.00         | 186.66         |
| donor 12 | 9.58         | 1.45          | 34.04        | 5.25         | 14227.37       | 28.41          | 74.76         | 0.88           | 4.40          | 1.96          | 73.30          |
| donor 13 | 53.56        | 18.35         | 343.74       | 181.16       | 3.94           | 47.30          | 18.99         | 48.60          | 70.71         | 173.56        | 345.30         |
| donor 14 | 0.84         | 8.83          | 226.24       | 132.50       | 32.74          | 33.66          | 16.16         | 55.29          | 42.28         | 19.97         | 96.53          |
| donor 15 | 8.79         | 4.22          | 48.81        | 30.80        | 13.12          | 21.42          | 8.38          | 14.30          | 22.01         | 40.51         | 2.68           |
| donor 16 | 8.77         | 4.50          | 83.09        | 42.30        | 14.26          | 12.88          | 8.68          | 15.88          | 17.75         | 61.66         | 102.51         |
| donor 17 | 3.12         | 2.92          | 23.60        | 37.71        | 15.23          | 5.58           | 4.55          | 10.79          | 7.51          | 7.85          | 9.69           |
| donor 18 | 3.58         | 1.23          | 35.67        | 26.79        | 31.06          | 10.12          | 4.23          | 11.94          | 11.19         | 19.77         | 23.58          |

|          | mir93/mir16   | mir93/mir20a   | mir93/mir21   | mir93/mir26b   | mir93/mir106b | mir93/mir125b   | mir93/mir141   | mir93/mir200b   | mir93/mir205   | mir93/mir375   | mir93/mir451a   |
|----------|---------------|----------------|---------------|----------------|---------------|-----------------|----------------|-----------------|----------------|----------------|-----------------|
| donor 1  | 1.33          | 0.36           | 5.28          | 0.06           | 0.03          | 0.00            | 0.00           | 0.26            | 0.93           | 1.37           | 20.89           |
| donor 2  | 0.45          | 0.14           | 2.94          | 0.04           | 0.02          | 0.00            | 0.01           | 0.13            | 0.26           | 0.22           | 5.48            |
| donor 3  | 0.85          | 0.32           | 3.57          | 0.11           | 0.04          | 0.02            | 0.00           | 0.24            | 0.64           | 1.25           | 18.23           |
| donor 4  | 0.63          | 0.22           | 3.79          | 0.09           | 0.11          | 0.00            | 0.00           | 0.20            | 0.35           | 0.70           | 9.57            |
| donor 5  | 2.18          | 0.44           | 3.14          | 0.09           | 0.08          | 0.99            | 0.36           | 0.09            | 0.19           | 1.46           | 21.34           |
| donor 6  | 2.70          | 0.81           | 6.81          | 0.36           | 2.40          | 2.57            | 0.33           | 0.57            | 0.24           | 1.10           | 10.28           |
| donor 7  | 1.65          | 0.80           | 4.61          | 0.16           | 0.16          | 2.74            | 0.46           | 0.25            | 0.28           | 0.59           | 15.71           |
| donor 8  | 0.02          | 0.34           | 3.22          | 0.09           | 0.00          | 1.41            | 0.45           | 0.14            | 0.26           | 0.66           | 4.88            |
| donor 9  | 3.76          | 0.32           | 15.75         | 0.13           | 0.01          | 3.39            | 1.84           | 0.41            | 0.97           | 1.97           | 18.74           |
| donor 10 | 1.18          | 0.40           | 9.84          | 0.06           | 0.01          | 11.86           | 3.35           | 0.85            | 2.83           | 0.26           | 7.56            |
| donor 11 | 1.06          | 0.23           | 3.71          | 0.05           | 0.01          | 3.37            | 2.34           | 0.34            | 0.97           | 2.26           | 8.78            |
| donor 12 | 1.83          | 0.28           | 6.49          | 0.19           | 2712.34       | 5.42            | 14.25          | 0.17            | 0.84           | 0.37           | 13.97           |
| donor 13 | 0.30          | 0.10           | 1.90          | 0.01           | 0.02          | 0.26            | 0.10           | 0.27            | 0.39           | 0.96           | 1.91            |
| donor 14 | 0.01          | 0.07           | 1.71          | 0.01           | 0.25          | 0.25            | 0.12           | 0.42            | 0.32           | 0.15           | 0.73            |
| donor 15 | 0.29          | 0.14           | 1.58          | 0.03           | 0.43          | 0.70            | 0.27           | 0.46            | 0.71           | 1.32           | 0.09            |
| donor 16 | 0.21          | 0.11           | 1.96          | 0.02           | 0.34          | 0.30            | 0.21           | 0.38            | 0.42           | 1.46           | 2.42            |
| donor 17 | 0.08          | 0.08           | 0.63          | 0.03           | 0.40          | 0.15            | 0.12           | 0.29            | 0.20           | 0.21           | 0.26            |
| donor 18 | 0.13          | 0.05           | 1.33          | 0.04           | 1.16          | 0.38            | 0.16           | 0.45            | 0.42           | 0.74           | 0.88            |
|          | mir106b/mir16 | mir106b/mir20a | mir106b/mir21 | mir106b/mir26b | mir106b/mir93 | mir106b/mir125b | mir106b/mir141 | mir106b/mir200b | mir106b/mir205 | mir106b/mir375 | mir106b/mir451a |
| donor 1  | 50.04         | 13.43          | 198.77        | 2.29           | 37.66         | 0.15            | 0.04           | 9.73            | 34.95          | 51.77          | 786.58          |
| donor 2  | 23.40         | 7.18           | 153.43        | 1.87           | 52.11         | 0.17            | 0.44           | 6.75            | 13.70          | 11.67          | 285.53          |
| donor 3  | 20.25         | 7.56           | 84.83         | 2.70           | 23.79         | 0.51            | 0.03           | 5.69            | 15.16          | 29.74          | 433.70          |
| donor 4  | 5.74          | 2.00           | 34.75         | 0.82           | 9.18          | 0.02            | 0.00           | 1.79            | 3.18           | 6.39           | 87.88           |
| donor 5  | 26.29         | 5.26           | 37.94         | 1.05           | 12.08         | 12.02           | 4.36           | 1.07            | 2.27           | 17.68          | 257.91          |
| donor 6  | 1.13          | 0.34           | 2.84          | 0.15           | 0.42          | 1.07            | 0.14           | 0.24            | 0.10           | 0.46           | 4.29            |
| donor 7  | 10.20         | 4.92           | 28.51         | 1.01           | 6.19          | 16.95           | 2.83           | 1.54            | 1.72           | 3.66           | 97.16           |
| donor 8  | 5.71          | 120.23         | 1128.53       | 30.96          | 350.30        | 492.87          | 157.26         | 49.82           | 90.04          | 230.43         | 1708.94         |
| donor 9  | 356.55        | 30.61          | 1492.05       | 12.62          | 94.74         | 321.03          | 174.16         | 39.28           | 91.87          | 186.28         | 1775.42         |
| donor 10 | 94.25         | 31.87          | 784.12        | 4.57           | 79.69         | 945.29          | 267.29         | 67.85           | 225.38         | 20.74          | 602.04          |
| donor 11 | 167.00        | 37.04          | 585.50        | 7.42           | 157.74        | 532.21          | 369.15         | 53.05           | 152.39         | 356.31         | 1385.60         |
| donor 12 | 0.00          | 0.00           | 0.00          | 0.00           | 0.00          | 0.00            | 0.01           | 0.00            | 0.00           | 0.00           | 0.01            |
| donor 13 | 13.60         | 4.66           | 87.25         | 0.25           | 45.98         | 12.01           | 4.82           | 12.34           | 17.95          | 44.05          | 87.65           |
| donor 14 | 0.03          | 0.27           | 6.91          | 0.03           | 4.05          | 1.03            | 0.49           | 1.69            | 1.29           | 0.61           | 2.95            |
| donor 15 | 0.67          | 0.32           | 3.72          | 0.08           | 2.35          | 1.63            | 0.64           | 1.09            | 1.68           | 3.09           | 0.20            |
| donor 16 | 0.61          | 0.32           | 5.83          | 0.07           | 2.97          | 0.90            | 0.61           | 1.11            | 1.25           | 4.33           | 7.19            |
| donor 17 | 0.20          | 0.19           | 1.55          | 0.07           | 2.48          | 0.37            | 0.30           | 0.71            | 0.49           | 0.52           | 0.64            |
| donor 18 | 0.12          | 0.04           | 1.15          | 0.03           | 0.86          | 0.33            | 0.14           | 0.38            | 0.36           | 0.64           | 0.76            |

|          | mir125b/mir16 | mir125b/mir20a | mir125b/mir21 | mir125b/mir26b | mir125b/mir93 | mir125b/mir106b | mir125b/mir141 | mir125b/mir200b | mir125b/mir205 | mir125b/mir375 | mir125b/mir451a |
|----------|---------------|----------------|---------------|----------------|---------------|-----------------|----------------|-----------------|----------------|----------------|-----------------|
| donor 1  | 329.24        | 88.35          | 1307.94       | 15.05          | 247.81        | 6.58            | 0.25           | 64.00           | 230.00         | 340.66         | 5175.76         |
| donor 2  | 140.21        | 43.00          | 919.29        | 11.21          | 312.20        | 5.99            | 2.63           | 40.42           | 82.08          | 69.91          | 1710.77         |
| donor 3  | 39.34         | 14.68          | 164.78        | 5.25           | 46.20         | 1.94            | 0.06           | 11.05           | 29.44          | 57.77          | 842.40          |
| donor 4  | 258.73        | 90.24          | 1565.72       | 36.87          | 413.57        | 45.06           | 0.16           | 80.85           | 143.52         | 287.82         | 3959.88         |
| donor 5  | 2.19          | 0.44           | 3.16          | 0.09           | 1.01          | 0.08            | 0.36           | 0.09            | 0.19           | 1.47           | 21.46           |
| donor 6  | 1.05          | 0.31           | 2.65          | 0.14           | 0.39          | 0.93            | 0.13           | 0.22            | 0.09           | 0.43           | 3.99            |
| donor 7  | 0.60          | 0.29           | 1.68          | 0.06           | 0.36          | 0.06            | 0.17           | 0.09            | 0.10           | 0.22           | 5.73            |
| donor 8  | 0.01          | 0.24           | 2.29          | 0.06           | 0.71          | 0.00            | 0.32           | 0.10            | 0.18           | 0.47           | 3.47            |
| donor 9  | 1.11          | 0.10           | 4.65          | 0.04           | 0.30          | 0.00            | 0.54           | 0.12            | 0.29           | 0.58           | 5.53            |
| donor 10 | 0.10          | 0.03           | 0.83          | 0.00           | 0.08          | 0.00            | 0.28           | 0.07            | 0.24           | 0.02           | 0.64            |
| donor 11 | 0.31          | 0.07           | 1.10          | 0.01           | 0.30          | 0.00            | 0.69           | 0.10            | 0.29           | 0.67           | 2.60            |
| donor 12 | 0.34          | 0.05           | 1.20          | 0.04           | 0.18          | 500.82          | 2.63           | 0.03            | 0.16           | 0.07           | 2.58            |
| donor 13 | 1.13          | 0.39           | 7.27          | 0.02           | 3.83          | 0.08            | 0.40           | 1.03            | 1.49           | 3.67           | 7.30            |
| donor 14 | 0.02          | 0.26           | 6.72          | 0.03           | 3.94          | 0.97            | 0.48           | 1.64            | 1.26           | 0.59           | 2.87            |
| donor 15 | 0.41          | 0.20           | 2.28          | 0.05           | 1.44          | 0.61            | 0.39           | 0.67            | 1.03           | 1.89           | 0.13            |
| donor 16 | 0.68          | 0.35           | 6.45          | 0.08           | 3.28          | 1.11            | 0.67           | 1.23            | 1.38           | 4.79           | 7.96            |
| donor 17 | 0.56          | 0.52           | 4.23          | 0.18           | 6.76          | 2.73            | 0.82           | 1.93            | 1.35           | 1.41           | 1.74            |
| donor 18 | 0.35          | 0.12           | 3.53          | 0.10           | 2.65          | 3.07            | 0.42           | 1.18            | 1.11           | 1.95           | 2.33            |
|          | mir141/mir16  | mir141/mir20a  | mir141/mir21  | mir141/mir26b  | mir141/mir93  | mir141/mir106b  | mir141/mir125b | mir141/mir200b  | mir141/mir205  | mir141/mir375  | mir141/mir451a  |
| donor 1  | 1331.47       | 357.30         | 5289.37       | 60.86          | 1002.15       | 26.61           | 4.04           | 258.84          | 930.12         | 1377.63        | 20931.02        |
| donor 2  | 53.23         | 16.33          | 349.03        | 4.25           | 118.53        | 2.27            | 0.38           | 15.34           | 31.16          | 26.54          | 649.53          |
| donor 3  | 651.81        | 243.18         | 2730.40       | 86.91          | 765.62        | 32.19           | 16.57          | 183.18          | 487.91         | 957.20         | 13958.78        |
| donor 4  | 1586.58       | 553.36         | 9601.25       | 226.12         | 2536.11       | 276.33          | 6.13           | 495.76          | 880.09         | 1764.95        | 24282.70        |
| donor 5  | 6.04          | 1.21           | 8.71          | 0.24           | 2.77          | 0.23            | 2.76           | 0.24            | 0.52           | 4.06           | 59.22           |
| donor 6  | 8.26          | 2.46           | 20.81         | 1.10           | 3.06          | 7.33            | 7.86           | 1.74            | 0.74           | 3.35           | 31.42           |
| donor 7  | 3.60          | 1.74           | 10.06         | 0.36           | 2.18          | 0.35            | 5.98           | 0.54            | 0.61           | 1.29           | 34.28           |
| donor 8  | 0.04          | 0.76           | 7.18          | 0.20           | 2.23          | 0.01            | 3.13           | 0.32            | 0.57           | 1.47           | 10.87           |
| donor 9  | 2.05          | 0.18           | 8.57          | 0.07           | 0.54          | 0.01            | 1.84           | 0.23            | 0.53           | 1.07           | 10.19           |
| donor 10 | 0.35          | 0.12           | 2.93          | 0.02           | 0.30          | 0.00            | 3.54           | 0.25            | 0.84           | 0.08           | 2.25            |
| donor 11 | 0.45          | 0.10           | 1.59          | 0.02           | 0.43          | 0.00            | 1.44           | 0.14            | 0.41           | 0.97           | 3.75            |
| donor 12 | 0.13          | 0.02           | 0.46          | 0.01           | 0.07          | 190.31          | 0.38           | 0.01            | 0.06           | 0.03           | 0.98            |
| donor 13 | 2.82          | 0.97           | 18.10         | 0.05           | 9.54          | 0.21            | 2.49           | 2.56            | 3.72           | 9.14           | 18.19           |
| donor 14 | 0.05          | 0.55           | 14.00         | 0.06           | 8.20          | 2.03            | 2.08           | 3.42            | 2.62           | 1.24           | 5.97            |
| donor 15 | 1.05          | 0.50           | 5.83          | 0.12           | 3.68          | 1.57            | 2.56           | 1.71            | 2.63           | 4.84           | 0.32            |
| donor 16 | 1.01          | 0.52           | 9.57          | 0.12           | 4.87          | 1.64            | 1.48           | 1.83            | 2.04           | 7.10           | 11.81           |
| donor 17 | 0.69          | 0.64           | 5.18          | 0.22           | 8.28          | 3.35            | 1.23           | 2.37            | 1.65           | 1.72           | 2.13            |
| donor 18 | 0.85          | 0.29           | 8.43          | 0.24           | 6.33          | 7.34            | 2.39           | 2.82            | 2.65           | 4.67           | 5.58            |

|          | mir200b/mir16 | mir200b/mir20a | mir200b/mir21 | mir200b/mir26b | mir200b/mir93 | mir200b/mir106b | mir200b/mir125b | mir200b/mir141 | mir200b/mir205 | mir200b/mir375 | mir200b/mir451a |
|----------|---------------|----------------|---------------|----------------|---------------|-----------------|-----------------|----------------|----------------|----------------|-----------------|
| donor 1  | 5.14          | 1.38           | 20.44         | 0.24           | 3.87          | 0.10            | 0.02            | 0.00           | 3.59           | 5.32           | 80.87           |
| donor 2  | 3.47          | 1.06           | 22.75         | 0.28           | 7.72          | 0.15            | 0.02            | 0.07           | 2.03           | 1.73           | 42.33           |
| donor 3  | 3.56          | 1.33           | 14.91         | 0.47           | 4.18          | 0.18            | 0.09            | 0.01           | 2.66           | 5.23           | 76.20           |
| donor 4  | 3.20          | 1.12           | 19.37         | 0.46           | 5.12          | 0.56            | 0.01            | 0.00           | 1.78           | 3.56           | 48.98           |
| donor 5  | 24.66         | 4.93           | 35.60         | 0.98           | 11.34         | 0.94            | 11.27           | 4.09           | 2.13           | 16.59          | 241.97          |
| donor 6  | 4.74          | 1.41           | 11.94         | 0.63           | 1.75          | 4.20            | 4.51            | 0.57           | 0.42           | 1.93           | 18.03           |
| donor 7  | 6.61          | 3.19           | 18.49         | 0.65           | 4.01          | 0.65            | 10.99           | 1.84           | 1.11           | 2.37           | 63.01           |
| donor 8  | 0.11          | 2.41           | 22.65         | 0.62           | 7.03          | 0.02            | 9.89            | 3.16           | 1.81           | 4.62           | 34.30           |
| donor 9  | 9.08          | 0.78           | 37.99         | 0.32           | 2.41          | 0.03            | 8.17            | 4.43           | 2.34           | 4.74           | 45.20           |
| donor 10 | 1.39          | 0.47           | 11.56         | 0.07           | 1.17          | 0.01            | 13.93           | 3.94           | 3.32           | 0.31           | 8.87            |
| donor 11 | 3.15          | 0.70           | 11.04         | 0.14           | 2.97          | 0.02            | 10.03           | 6.96           | 2.87           | 6.72           | 26.12           |
| donor 12 | 10.82         | 1.63           | 38.47         | 1.13           | 5.93          | 16078.91        | 32.11           | 84.49          | 4.98           | 2.22           | 82.84           |
| donor 13 | 1.10          | 0.38           | 7.07          | 0.02           | 3.73          | 0.08            | 0.97            | 0.39           | 1.45           | 3.57           | 7.10            |
| donor 14 | 0.02          | 0.16           | 4.09          | 0.02           | 2.40          | 0.59            | 0.61            | 0.29           | 0.76           | 0.36           | 1.75            |
| donor 15 | 0.61          | 0.30           | 3.41          | 0.07           | 2.15          | 0.92            | 1.50            | 0.59           | 1.54           | 2.83           | 0.19            |
| donor 16 | 0.55          | 0.28           | 5.23          | 0.06           | 2.66          | 0.90            | 0.81            | 0.55           | 1.12           | 3.88           | 6.46            |
| donor 17 | 0.29          | 0.27           | 2.19          | 0.09           | 3.49          | 1.41            | 0.52            | 0.42           | 0.70           | 0.73           | 0.90            |
| donor 18 | 0.30          | 0.10           | 2.99          | 0.08           | 2.24          | 2.60            | 0.85            | 0.35           | 0.94           | 1.66           | 1.97            |
|          | mir205/mir16  | mir205/mir20a  | mir205/mir21  | mir205/mir26b  | mir205/mir93  | mir205/mir106b  | mir205/mir125b  | mir205/mir141  | mir205/mir200b | mir205/mir375  | mir205/mir451a  |
| donor 1  | 1.43          | 0.38           | 5.69          | 0.07           | 1.08          | 0.03            | 0.00            | 0.00           | 0.28           | 1.48           | 22.50           |
| donor 2  | 1.71          | 0.52           | 11.20         | 0.14           | 3.80          | 0.07            | 0.01            | 0.03           | 0.49           | 0.85           | 20.84           |
| donor 3  | 1.34          | 0.50           | 5.60          | 0.18           | 1.57          | 0.07            | 0.03            | 0.00           | 0.38           | 1.96           | 28.61           |
| donor 4  | 1.80          | 0.63           | 10.91         | 0.26           | 2.88          | 0.31            | 0.01            | 0.00           | 0.56           | 2.01           | 27.59           |
| donor 5  | 11.60         | 2.32           | 16.74         | 0.46           | 5.33          | 0.44            | 5.30            | 1.92           | 0.47           | 7.80           | 113.77          |
| donor 6  | 11.19         | 3.33           | 28.18         | 1.48           | 4.14          | 9.92            | 10.65           | 1.35           | 2.36           | 4.54           | 42.53           |
| donor 7  | 5.94          | 2.87           | 16.61         | 0.59           | 3.60          | 0.58            | 9.87            | 1.65           | 0.90           | 2.13           | 56.60           |
| donor 8  | 0.06          | 1.34           | 12.53         | 0.34           | 3.89          | 0.01            | 5.47            | 1.75           | 0.55           | 2.56           | 18.98           |
| donor 9  | 3.88          | 0.33           | 16.24         | 0.14           | 1.03          | 0.01            | 3.49            | 1.90           | 0.43           | 2.03           | 19.33           |
| donor 10 | 0.42          | 0.14           | 3.48          | 0.02           | 0.35          | 0.00            | 4.19            | 1.19           | 0.30           | 0.09           | 2.67            |
| donor 11 | 1.10          | 0.24           | 3.84          | 0.05           | 1.04          | 0.01            | 3.49            | 2.42           | 0.35           | 2.34           | 9.09            |
| donor 12 | 2.17          | 0.33           | 7.73          | 0.23           | 1.19          | 3230.72         | 6.45            | 16.98          | 0.20           | 0.45           | 16.64           |
| donor 13 | 0.76          | 0.26           | 4.86          | 0.01           | 2.56          | 0.06            | 0.67            | 0.27           | 0.69           | 2.45           | 4.88            |
| donor 14 | 0.02          | 0.21           | 5.35          | 0.02           | 3.13          | 0.77            | 0.80            | 0.38           | 1.31           | 0.47           | 2.28            |
| donor 15 | 0.40          | 0.19           | 2.22          | 0.05           | 1.40          | 0.60            | 0.97            | 0.38           | 0.65           | 1.84           | 0.12            |
| donor 16 | 0.49          | 0.25           | 4.68          | 0.06           | 2.38          | 0.80            | 0.73            | 0.49           | 0.89           | 3.47           | 5.77            |
| donor 17 | 0.42          | 0.39           | 3.14          | 0.13           | 5.02          | 2.03            | 0.74            | 0.61           | 1.44           | 1.04           | 1.29            |
| donor 18 | 0.32          | 0.11           | 3.19          | 0.09           | 2.39          | 2.78            | 0.90            | 0.38           | 1.07           | 1.77           | 2.11            |

|          | mir375/mir16  | mir375/mir20a  | mir375/mir21  | mir375/mir26b  | mir375/mir93  | mir375/mir106b  | mir375/mir125b  | mir375/mir141  | mir375/mir200b  | mir375/mir205  | mir375/mir451a |
|----------|---------------|----------------|---------------|----------------|---------------|-----------------|-----------------|----------------|-----------------|----------------|----------------|
| donor 1  | 0.97          | 0.26           | 3.84          | 0.04           | 0.73          | 0.02            | 0.00            | 0.00           | 0.19            | 0.68           | 15.19          |
| donor 2  | 2.01          | 0.62           | 13.15         | 0.16           | 4.47          | 0.09            | 0.01            | 0.04           | 0.58            | 1.17           | 24.47          |
| donor 3  | 0.68          | 0.25           | 2.85          | 0.09           | 0.80          | 0.03            | 0.02            | 0.00           | 0.19            | 0.51           | 14.58          |
| donor 4  | 0.90          | 0.31           | 5.44          | 0.13           | 1.44          | 0.16            | 0.00            | 0.00           | 0.28            | 0.50           | 13.76          |
| donor 5  | 1.49          | 0.30           | 2.15          | 0.06           | 0.68          | 0.06            | 0.68            | 0.25           | 0.06            | 0.13           | 14.59          |
| donor 6  | 2.46          | 0.73           | 6.20          | 0.33           | 0.91          | 2.18            | 2.34            | 0.30           | 0.52            | 0.22           | 9.36           |
| donor 7  | 2.79          | 1.34           | 7.79          | 0.28           | 1.69          | 0.27            | 4.63            | 0.77           | 0.42            | 0.47           | 26.55          |
| donor 8  | 0.02          | 0.52           | 4.90          | 0.13           | 1.52          | 0.00            | 2.14            | 0.68           | 0.22            | 0.39           | 7.42           |
| donor 9  | 1.91          | 0.16           | 8.01          | 0.07           | 0.51          | 0.01            | 1.72            | 0.93           | 0.21            | 0.49           | 9.53           |
| donor 10 | 4.54          | 1.54           | 37.81         | 0.22           | 3.84          | 0.05            | 45.58           | 12.89          | 3.27            | 10.87          | 29.03          |
| donor 11 | 0.47          | 0.10           | 1.64          | 0.02           | 0.44          | 0.00            | 1.49            | 1.04           | 0.15            | 0.43           | 3.89           |
| donor 12 | 4.88          | 0.74           | 17.36         | 0.51           | 2.67          | 7255.02         | 14.49           | 38.12          | 0.45            | 2.25           | 37.38          |
| donor 13 | 0.31          | 0.11           | 1.98          | 0.01           | 1.04          | 0.02            | 0.27            | 0.11           | 0.28            | 0.41           | 1.99           |
| donor 14 | 0.04          | 0.44           | 11.33         | 0.05           | 6.64          | 1.64            | 1.69            | 0.81           | 2.77            | 2.12           | 4.83           |
| donor 15 | 0.22          | 0.10           | 1.20          | 0.02           | 0.76          | 0.32            | 0.53            | 0.21           | 0.35            | 0.54           | 0.07           |
| donor 16 | 0.14          | 0.07           | 1.35          | 0.02           | 0.69          | 0.23            | 0.21            | 0.14           | 0.26            | 0.29           | 1.66           |
| donor 17 | 0.40          | 0.37           | 3.01          | 0.13           | 4.81          | 1.94            | 0.71            | 0.58           | 1.38            | 0.96           | 1.24           |
| donor 18 | 0.18          | 0.06           | 1.80          | 0.05           | 1.36          | 1.57            | 0.51            | 0.21           | 0.60            | 0.57           | 1.19           |
|          | mir451a/mir16 | mir451a/mir20a | mir451a/mir21 | mir451a/mir26b | mir451a/mir93 | mir451a/mir106b | mir451a/mir125b | mir451a/mir141 | mir451a/mir200b | mir451a/mir205 | mir451a/mir375 |
| donor 1  | 0.06          | 0.02           | 0.25          | 0.00           | 0.05          | 0.00            | 0.00            | 0.00           | 0.01            | 0.04           | 0.07           |
| donor 2  | 0.08          | 0.03           | 0.54          | 0.01           | 0.18          | 0.00            | 0.00            | 0.00           | 0.02            | 0.05           | 0.04           |
| donor 3  | 0.05          | 0.02           | 0.20          | 0.01           | 0.05          | 0.00            | 0.00            | 0.00           | 0.01            | 0.03           | 0.07           |
| donor 4  | 0.07          | 0.02           | 0.40          | 0.01           | 0.10          | 0.01            | 0.00            | 0.00           | 0.02            | 0.04           | 0.07           |
| donor 5  | 0.10          | 0.02           | 0.15          | 0.00           | 0.05          | 0.00            | 0.05            | 0.02           | 0.00            | 0.01           | 0.07           |
| donor 6  | 0.26          | 0.08           | 0.66          | 0.03           | 0.10          | 0.23            | 0.25            | 0.03           | 0.06            | 0.02           | 0.11           |
| donor 7  | 0.10          | 0.05           | 0.29          | 0.01           | 0.06          | 0.01            | 0.17            | 0.03           | 0.02            | 0.02           | 0.04           |
| donor 8  | 0.00          | 0.07           | 0.66          | 0.02           | 0.20          | 0.00            | 0.29            | 0.09           | 0.03            | 0.05           | 0.13           |
| donor 9  | 0.20          | 0.02           | 0.84          | 0.01           | 0.05          | 0.00            | 0.18            | 0.10           | 0.02            | 0.05           | 0.10           |
| donor 10 | 0.16          | 0.05           | 1.30          | 0.01           | 0.13          | 0.00            | 1.57            | 0.44           | 0.11            | 0.37           | 0.03           |
| donor 11 | 0.12          | 0.03           | 0.42          | 0.01           | 0.11          | 0.00            | 0.38            | 0.27           | 0.04            | 0.11           | 0.26           |
| donor 12 | 0.13          | 0.02           | 0.46          | 0.01           | 0.07          | 194.10          | 0.39            | 1.02           | 0.01            | 0.06           | 0.03           |
| donor 13 | 0.16          | 0.05           | 1.00          | 0.00           | 0.52          | 0.01            | 0.14            | 0.05           | 0.14            | 0.20           | 0.50           |
| donor 14 | 0.01          | 0.09           | 2.34          | 0.01           | 1.37          | 0.34            | 0.35            | 0.17           | 0.57            | 0.44           | 0.21           |
| donor 15 | 3.28          | 1.58           | 18.23         | 0.37           | 11.50         | 4.90            | 8.00            | 3.13           | 5.34            | 8.22           | 15.13          |
| donor 16 | 0.09          | 0.04           | 0.81          | 0.01           | 0.41          | 0.14            | 0.13            | 0.08           | 0.15            | 0.17           | 0.60           |
| donor 17 | 0.32          | 0.30           | 2.43          | 0.10           | 3.89          | 1.57            | 0.58            | 0.47           | 1.11            | 0.77           | 0.81           |
| donor 18 | 0.15          | 0.05           | 1.51          | 0.04           | 1.14          | 1.32            | 0.43            | 0.18           | 0.51            | 0.47           | 0.84           |



Supplementary Table S6. AUC values for all miRNA pairs (all patients and donors)

|                 | AUC   |                 | AUC   |                 | AUC   |
|-----------------|-------|-----------------|-------|-----------------|-------|
| mir205/mir375   | 0.925 | mir20a/mir93    | 0.696 | mir20a/mir451a  | 0.569 |
| mir26b/mir375   | 0.911 | mir205/mir16    | 0.696 | mir125b/mir16   | 0.566 |
| mir20a/mir375   | 0.871 | mir205/mir26b   | 0.692 | mir93/mir200b   | 0.564 |
| mir125b/mir375  | 0.832 | mir106b/mir375  | 0.687 | mir451a/mir200b | 0.563 |
| mir21/mir375    | 0.808 | mir141/mir200b  | 0.678 | mir20a/mir141   | 0.556 |
| mir93/mir375    | 0.800 | mir141/mir106b  | 0.670 | mir20a/mir16    | 0.556 |
| mir141/mir375   | 0.794 | mir125b/mir21   | 0.668 | mir16/mir106b   | 0.553 |
| mir16/mir375    | 0.789 | mir125b/mir200b | 0.667 | mir93/mir21     | 0.550 |
| mir26b/mir200b  | 0.775 | mir26b/mir106b  | 0.654 | mir93/mir106b   | 0.528 |
| mir451a/mir375  | 0.762 | mir26b/mir451a  | 0.651 | mir125b/mir141  | 0.528 |
| mir26b/mir21    | 0.749 | mir125b/mir93   | 0.637 | mir16/mir93     | 0.526 |
| mir205/mir21    | 0.743 | mir141/mir93    | 0.630 | mir26b/mir125b  | 0.526 |
| mir26b/mir93    | 0.743 | mir205/mir141   | 0.623 | mir205/mir125b  | 0.520 |
| mir205/mir20a   | 0.734 | mir26b/mir20a   | 0.621 | mir451a/mir93   | 0.516 |
| mir200b/mir375  | 0.734 | mir26b/mir16    | 0.618 | mir125b/mir20a  | 0.513 |
| mir205/mir106b  | 0.730 | mir26b/mir141   | 0.613 | mir451a/mir141  | 0.510 |
| mir205/mir93    | 0.728 | mir16/mir200b   | 0.602 | mir16/mir451a   | 0.507 |
| mir205/mir200b  | 0.725 | mir16/mir21     | 0.601 | mir141/mir16    | 0.504 |
| mir20a/mir200b  | 0.721 | mir141/mir21    | 0.601 | mir451a/mir106b | 0.503 |
| mir20a/mir21    | 0.715 | mir451a/mir21   | 0.599 | mir200b/mir21   | 0.503 |
| mir205/mir451a  | 0.705 | mir20a/mir106b  | 0.573 | mir200b/mir106b | 0.501 |
| mir125b/mir106b | 0.700 | mir125b/mir451a | 0.572 | mir21/mir106b   | 0.500 |

Supplementary Table S7. Prognostic potency of amp-Ratio values of miRNA pairs

|                  | Gleason score AUC   |              |              |
|------------------|---------------------|--------------|--------------|
|                  | Gl-6 vs HD          | Gl-7 vs HD   | Gl-8/9 vs HD |
| Mir-205/mir-20a  | 0.625               | 0.739        | 0.935        |
| Mir-26b/mir-21   | 0.644               | 0.761        | 0.917        |
| Mir-26b/mir-93   | 0.699               | 0.736        | 0.852        |
| Mir-451a/mir-375 | 0.699               | 0.778        | 0.833        |
|                  | PSA level AUC       |              |              |
|                  | PSA<12 vs HD        | PSA>12 vs HD |              |
| Mir-205/mi-r375  | 0.889               | 0.971        |              |
| Mir-20a/mir-375  | 0.817               | 0.938        |              |
| Mir-26b/mir-375  | 0.894               | 0.931        |              |
| Mir-21/mir-375   | 0.762               | 0.866        |              |
|                  | Prostate volume AUC |              |              |
|                  | V<50 vs HD          | V>50 vs HD   |              |
| Mir-26b/mir-375  | 0.891               | 0.936        |              |
| Mir-125b/mir-375 | 0.783               | 0.927        |              |
| Mir-21/mir-375   | 0.79                | 0.833        |              |
| Mir-141/mir-375  | 0.785               | 0.821        |              |

## List of references

1. Duan. M.; Long. Y.; Yang. C.; Wu. X.; Sun. Y.; Li. J.; Hu. X.; Lin. W.; Han. D.; Zhao. Y.; et al. Selection and characterization of DNA aptamer for metastatic prostate cancer recognition and tissue imaging. *Oncotarget* **2016**. 7. doi:10.18632/oncotarget.9262.
2. Wang. Y.; Luo. Y.; Bing. T.; Chen. Z.; Lu. M.; Zhang. N.; Shangguan. D.; Gao. X. DNA aptamer evolved by cell-SELEX for recognition of prostate cancer. *PLoS One* **2014**. 9. doi:10.1371/journal.pone.0100243.
3. Li. P.; Yu. X.; Han. W.; Kong. Y.; Bao. W.; Zhang. J.; Zhang. W.; Gu. Y. Ultrasensitive and Reversible Nanoplatfrom of Urinary Exosomes for Prostate Cancer Diagnosis. *ACS Sensors* **2019**. 4. 1433–1441. doi:10.1021/acssensors.9b00621.
4. Li. B.; Liu. C.; Pan. W.; Shen. J.; Guo. J.; Luo. T.; Feng. J.; Situ. B.; An. T.; Zhang. Y.; et al. Facile fluorescent aptasensor using aggregation-induced emission luminogens for exosomal proteins profiling towards liquid biopsy. *Biosens. Bioelectron.* **2020**. 168. doi:10.1016/j.bios.2020.112520.
5. Almasi. F.; Gargari. S.L.M.; Bitaraf. F.; Rasoulinejad. S. Development of a single stranded DNA aptamer as a molecular probe for LNCap cells using cell-SELEX. *Avicenna J. Med. Biotechnol.* **2016**. 8.
6. Jin. D.; Yang. F.; Zhang. Y.; Liu. L.; Zhou. Y.; Wang. F.; Zhang. G.J. ExoAPP: Exosome-Oriented. Aptamer Nanoprobe-Enabled Surface Proteins Profiling and Detection. *Anal. Chem.* **2018**. 90. doi:10.1021/acs.analchem.8b03959.
7. Yang. D.K.; Chen. L.C.; Lee. M.Y.; Hsu. C.H.; Chen. C.S. Selection of aptamers for fluorescent detection of alpha-methylacyl-CoA racemase by single-bead SELEX. *Biosens. Bioelectron.* **2014**. 62. doi:10.1016/j.bios.2014.06.027.
8. Parekh. P.; Kamble. S.; Zhao. N.; Zeng. Z.; Portier. B.P.; Zu. Y. Immunotherapy of CD30-expressing lymphoma using a highly stable ssDNA aptamer. *Biomaterials* **2013**. 34. doi:10.1016/j.biomaterials.2013.07.099.
9. Jiang. Z.; Woda. B.A.; Rock. K.L.; Xu. Y.; Savas. L.; Khan. A.; Pihan. G.; Cai. F.; Babcook. J.S.; Rathanaswami. P.; et al. P504S: a new molecular marker for the detection of prostate carcinoma. *Am. J. Surg. Pathol.* **2001**. 25. 1397–1404. doi:10.1097/00000478-200111000-00007.
10. Cannistraci. A.; Di Pace. A.L.; De Maria. R.; Bonci. D. MicroRNA as New Tools for Prostate Cancer Risk Assessment and Therapeutic Intervention: Results from Clinical Data Set and Patients' Samples. *Biomed Res. Int.* **2014**. 2014.
11. Shin. S.; Park. Y.H.; Jung. S.H.; Jang. S.H.; Kim. M.Y.; Lee. J.Y.; Chung. Y. –J Urinary exosome microRNA signatures as a noninvasive prognostic biomarker for prostate cancer. *npj Genomic Med.* **2021**. 6. doi:10.1038/s41525-021-00212-w.
12. Borkowetz. A.; Lohse-Fischer. A.; Scholze. J.; Lotzkat. U.; Thomas. C.; Wirth. M.P.; Fuessel. S.; Erdmann. K. Evaluation of micrnas as non-invasive diagnostic markers in urinary cells from patients with suspected prostate cancer. *Diagnostics* **2020**. 10. doi:10.3390/diagnostics10080578.
13. Lin. H.M.; Castillo. L.; Mahon. K.L.; Chiam. K.; Lee. B.Y.; Nguyen. Q.; Boyer. M.J.; Stockler. M.R.; Pavlakis. N.; Marx. G.; et al. Circulating microRNAs are associated with docetaxel chemotherapy outcome in castration-resistant prostate cancer. *Br. J. Cancer* **2014**. 110. doi:10.1038/bjc.2014.181.
14. Fredsøe. J.; Rasmussen. A.K.I.; Mouritzen. P.; Bjerre. M.T.; Østergren. P.; Fode. M.; Borre. M.; Sørensen. K.D. Profiling of circulating microRNAs in prostate cancer reveals diagnostic biomarker potential. *Diagnostics* **2020**. 10. doi:10.3390/diagnostics10040188.
15. Stoen. M.J.; Andersen. S.; Rakaee. M.; Pedersen. M.I.; Ingebriksen. L.M.; Donnem. T.; Lombardi. A.P.G.; Kilvaer. T.K.; Busund. L.T.R.; Richardsen. E. Overexpression of mir-20a-5p in tumor epithelium is an independent negative prognostic indicator in prostate cancer—a multi-institutional study. *Cancers (Basel)*. **2021**. 13. doi:10.3390/cancers13164096.
16. Vanacore. D.; Boccellino. M.; Rossetti. S.; Cavaliere. C.; D'Aniello. C.; Di Franco. R.; Romano. F.J.; Montanari. M.; La Mantia. E.; Piscitelli. R.; et al. Micrnas in prostate cancer: An overview. *Oncotarget* **2017**. 8.
17. Bolayırılı. I.M.; Önal. B.; Adıgüzel. M.; Konukoğlu. D.; Demirdağ. Ç.; Kurtuluş. E.M.; Türegün. F.A.; Uzun. H. THE CLINICAL SIGNIFICANCE OF CIRCULATING miR-21. miR-142. miR-143. AND miR-146A IN PATIENTS WITH PROSTATE CANCER. *J. Med. Biochem.* **2022**. 41. doi:10.5937/jomb0-32046.
18. Porzycki. P.; Ciszakowicz. E.; Semik. M.; Tyrka. M. Combination of three miRNA (miR-141. miR-21. and miR-375) as potential diagnostic tool for prostate cancer recognition. *Int. Urol. Nephrol.* **2018**. 50. doi:10.1007/s11255-018-1938-2.
19. Cochetti. G.; Poli. G.; Guelfi. G.; Boni. A.; Egidi. M.G.; Mearini. E. Different levels of serum

- microRNAs in prostate cancer and benign prostatic hyperplasia: Evaluation of potential diagnostic and prognostic role. *Onco. Targets. Ther.* **2016**. 9. doi:10.2147/OTT.S119027.
20. Zhang. S.; Liu. C.; Zou. X.; Geng. X.; Zhou. X.; Fan. X.C.; Zhu. D.; Zhang. H.; Zhu. W. MicroRNA panel in serum reveals novel diagnostic biomarkers for prostate cancer. *PeerJ* 2021. 9.
  21. Jin. W.; Fei. X.; Wang. X.; Chen. F.; Song. Y. Circulating miRNAs as Biomarkers for Prostate Cancer Diagnosis in Subjects with Benign Prostatic Hyperplasia. *J. Immunol. Res.* **2020**. 2020. doi:10.1155/2020/5873056.
  22. Yin. W.; Chen. J.; Wang. G.; Zhang. D. MicroRNA-106b functions as an oncogene and regulates tumor viability and metastasis by targeting LARP4B in prostate cancer. *Mol. Med. Rep.* **2019**. 20. doi:10.3892/mmr.2019.10343.
  23. Mitchell. P.S.; Parkin. R.K.; Kroh. E.M.; Fritz. B.R.; Wyman. S.K.; Pogosova-Agadjanyan. E.L.; Peterson. A.; Noteboom. J.; O'Briant. K.C.; Allen. A.; et al. Circulating microRNAs as stable blood-based markers for cancer detection. *Proc. Natl. Acad. Sci. U. S. A.* **2008**. 105. doi:10.1073/pnas.0804549105.
  24. Konoshenko. M.Y.; Lekchnov. E.A.; Bryzgunova. O.E.; Zaporozhchenko. I.A.; Yarmoschuk. S. V.; Pashkovskaya. O.A.; Pak. S. V.; Laktionov. P.P. The panel of 12 cell-free microRNAs as potential biomarkers in prostate neoplasms. *Diagnostics* **2020**. 10. doi:10.3390/diagnostics10010038.
  25. Labbé. M.; Hoey. C.; Ray. J.; Potiron. V.; Supiot. S.; Liu. S.K.; Fradin. D. MicroRNAs identified in prostate cancer: Correlative studies on response to ionizing radiation. *Mol. Cancer* 2020. 19.
  26. Fan. B.; Jin. X.; Ding. Q.; Cao. C.; Shi. Y.; Zhu. H.; Zhou. W. Expression of mir-451a in prostate cancer and its effect on prognosis. *Iran. J. Public Health* **2021**. 50. doi:10.18502/ijph.v50i4.6002.
